# Supplementary material for: Stereodynamics and edge-to-face CH–π aromatic interactions in imino compounds containing heterocyclic rings
Source: Royal Society of Chemistry journal article supplement (doi:10.1039/c6ob02618d), 2017-01-01
Supplement: c6ob02618d1.pdf [file c6ob02618d1.pdf]

## Stereodynamics and Edge-to-Face CH- $\pi$ Aromatic Interactions in Imino Compounds Containing Heterocyclic Rings

M. Eugenia González-Rosende,<sup>\*a</sup> Encarna Castillo,<sup>a</sup> W. Brian Jennings,<sup>\*b</sup> and John F. Malone<sup>c</sup>

---

<sup>a</sup>*Departamento de Farmacia, Universidad CEU Cardenal Herrera, Avda. Seminario s/n, 46113, Moncada, Valencia, Spain. E-mail: [eugenia@uchceu.es](mailto:eugenia@uchceu.es)*

<sup>b</sup>*Department of Chemistry and Analytical & Biological Chemistry Research Facility, University College Cork, Cork, Ireland. Email: [brianj@ucc.ie](mailto:brianj@ucc.ie)*

<sup>c</sup>*School of Chemistry & Chemical Engineering, The Queen's University of Belfast, Belfast BT9 5AG, UK.*

### Supplementary Information

#### Page:

**S-1** Heading and list of contents.

**S-2** List of contents continued.

**S-3** Experimental (-) and best fit computed (●) exchange broadened <sup>1</sup>H NMR lineshape of the imino phenyl 2Ho signal of **1-E** at -46 °C in CD<sub>2</sub>Cl<sub>2</sub> (500 MHz); k = 1031 s<sup>-1</sup>.

**S-4** Calculated rates of rotation around the phenyl-imino bond in **1-E** at various temperatures and estimated free energy ( $\Delta G^\ddagger$ ), enthalpy ( $\Delta H^\ddagger$ ) and entropy ( $\Delta S^\ddagger$ ) of activation.

**S-5** Experimental (-) and best fit computed (●) exchange broadened <sup>1</sup>H NMR lineshape of the overlapping shielded **1-E** Ho and **1-Z** pyridyl H-2 signals at -65 °C in CD<sub>2</sub>Cl<sub>2</sub> (500 MHz).

**S-6** Experimental (-) and best fit computed (●) <sup>1</sup>H NMR lineshape of the exchange broadened imino phenyl 2Ho signal of **3-E** at -52 °C in CD<sub>2</sub>Cl<sub>2</sub> (500 MHz); k = 731 s<sup>-1</sup>.

**S-7** Experimental (-) and best fit computed (●) <sup>1</sup>H NMR lineshape of the exchange broadened imino phenyl 2Ho signal of **5-E** at 7 °C in CD<sub>2</sub>Cl<sub>2</sub> (500 MHz); k = 640 s<sup>-1</sup>.

**S-8** <sup>1</sup>H NMR (300 MHz) of compound **1** in CDCl<sub>3</sub>.

**S-9** <sup>13</sup>C NMR (75.4 MHz) of compound **1** in CDCl<sub>3</sub>.

**S-10** Mass Spectrum of compound **1**.

**S-11**  $^1\text{H}$  NMR (300 MHz) of compound **2** in  $\text{CDCl}_3$ .

**S-12**  $^{13}\text{C}$  NMR (75.4 MHz) of compound **2** in  $\text{CDCl}_3$ .

**S-13** Mass Spectrum of compound **2**.

**S-14**  $^1\text{H}$  NMR (300 MHz) of compound **3** in  $\text{CDCl}_3$ .

**S-15**  $^{13}\text{C}$  NMR (75.4 MHz) of compound **3** in  $\text{CDCl}_3$ .

**S-16** Mass Spectrum of compound **3**.

**S-17**  $^1\text{H}$  NMR (300 MHz) of compound **4** in  $\text{CDCl}_3$ .

**S-18** Mass Spectrum of compound **4**.

**S-19**  $^1\text{H}$  NMR (300 MHz) of compound **5** in  $\text{CDCl}_3$ .

**S-20**  $^{13}\text{C}$  NMR (75.4 MHz) of compound **5** in  $\text{CDCl}_3$ .

**S-21** Mass Spectrum of compound **5**.

**S-22**  $^1\text{H}$  NMR (300 MHz) of compound **6** in  $\text{CDCl}_3$ .

**S-23**  $^{13}\text{C}$  NMR (75.4 MHz) of compound **6** in  $\text{CDCl}_3$ .

**S-24** Mass Spectrum of compound **6**.

**S-25**  $^1\text{H}$  NMR (300 MHz) of compound **7** in  $\text{CDCl}_3$ .

**S-26**  $^{13}\text{C}$  NMR (75.4 MHz) of compound **7** in  $\text{CDCl}_3$ .

**S-27** Mass Spectrum of compound **7**.

**S-28**  $^1\text{H}$  NMR (300 MHz) of compound **8** in  $\text{CDCl}_3$ .

**S-29**  $^{13}\text{C}$  NMR (75.4 MHz) of compound **8** in  $\text{CDCl}_3$ .

**S-30** Mass Spectrum of compound **8**.

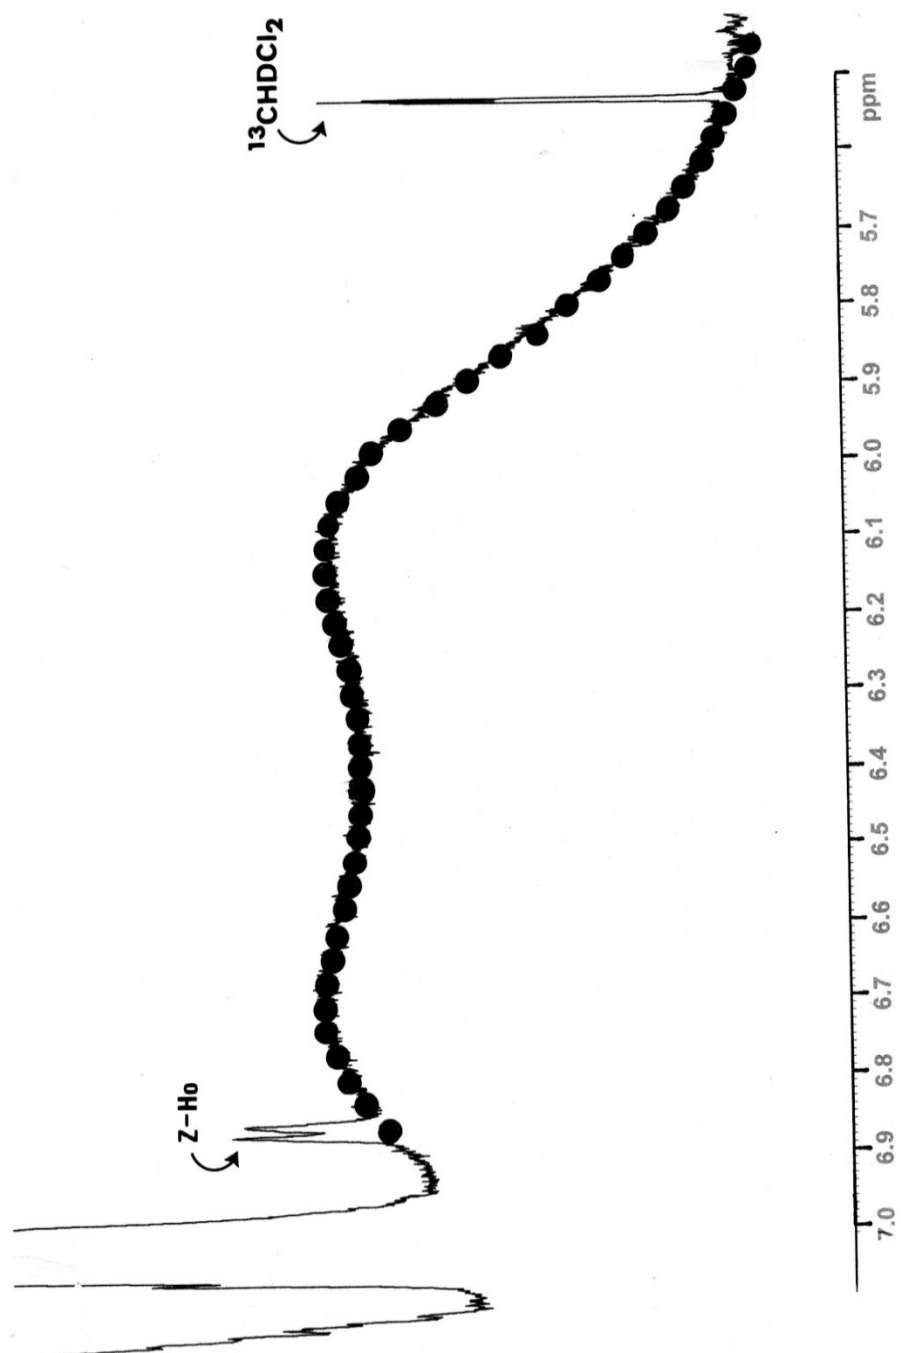

**Fig. S-3:** Experimental (-) and best fit computed (●) exchange broadened  $^1\text{H}$  NMR (500 MHz) lineshape of the imino phenyl 2Ho signal of **1-E** at  $-46\text{ }^\circ\text{C}$  in  $\text{CD}_2\text{Cl}_2$ ;  $k = 1031\text{ s}^{-1}$ .

### Barrier to rotation around the phenyl-imino bond in 1-*E*

| T/°K | $\Delta\nu$ /Hz | St. Dev./% <sup>a</sup> | k/s <sup>-1</sup> | $\Delta G^\ddagger$ /kcal mol <sup>-1</sup> |
|------|-----------------|-------------------------|-------------------|---------------------------------------------|
| 193  | 626             | 1.63                    | 56                | 9.59                                        |
| 199  | 610             | 0.97                    | 96                | 9.69                                        |
| 203  | 600             | 0.83                    | 128               | 9.77                                        |
| 208  | 590             | 0.48                    | 215               | 9.81                                        |
| 213  | 570             | 0.61                    | 349               | 9.85                                        |
| 227  | 548             | 0.86                    | 1031              | 10.03                                       |
| 233  | 523             | 0.54                    | 1813              | 10.05                                       |

<sup>a</sup> St. Dev. is the standard deviation between best fit computed spectrum and the experimental spectrum.

$$\Delta H^\ddagger = 7.6 \pm 0.4 \text{ kcal mol}^{-1} ; \Delta S^\ddagger = -10.5 \pm 2.0 \text{ cal mol}^{-1} \text{ K}^{-1}$$

$$\Delta G^\ddagger = \Delta H^\ddagger - T\Delta S^\ddagger$$

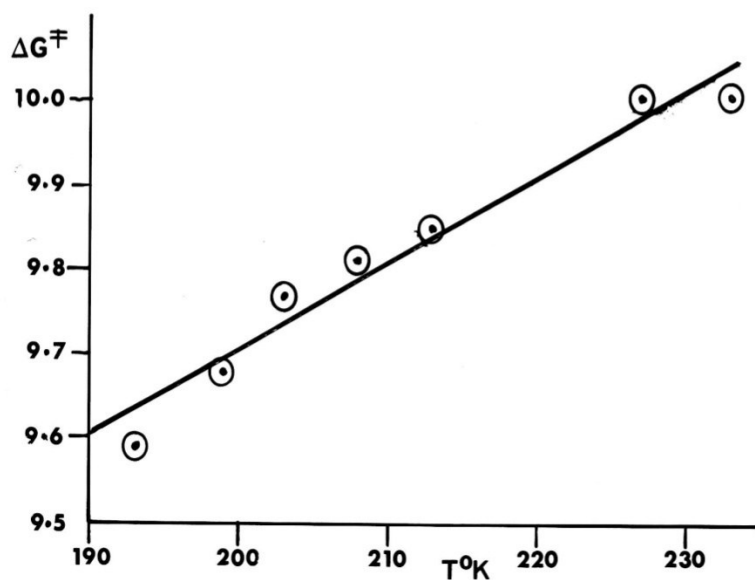

**Fig. S-4:** Calculated rates of rotation around the phenyl-imino bond in 1-*E* at various temperatures and estimated free energy ( $\Delta G^\ddagger$ ), enthalpy ( $\Delta H^\ddagger$ ) and entropy ( $\Delta S^\ddagger$ ) of activation.

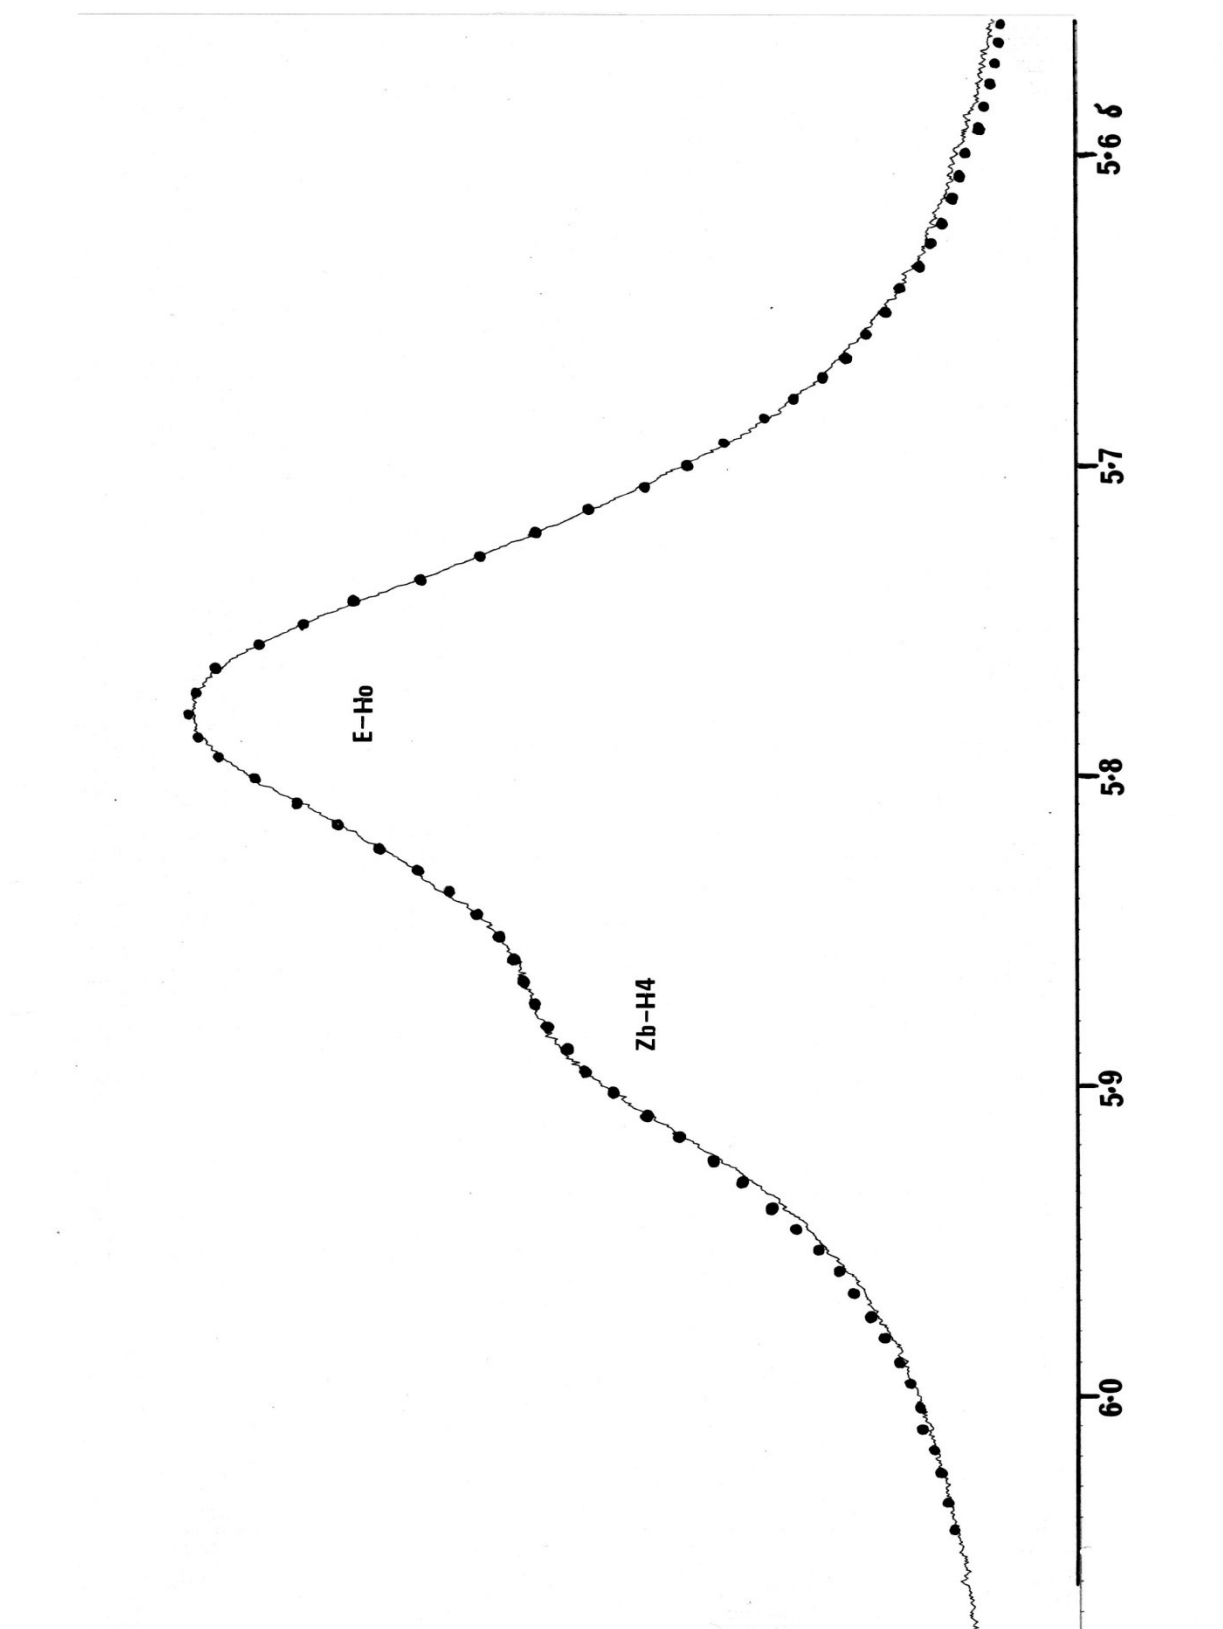

**Fig. S-5:** Experimental (-) and best fit computed (●) exchange broadened  $^1\text{H}$  NMR lineshape of the overlapping shielded **1-E** Ho and **1-Z** pyridyl H-2 signals at  $-65^\circ\text{C}$  in  $\text{CD}_2\text{Cl}_2$  (500MHz).

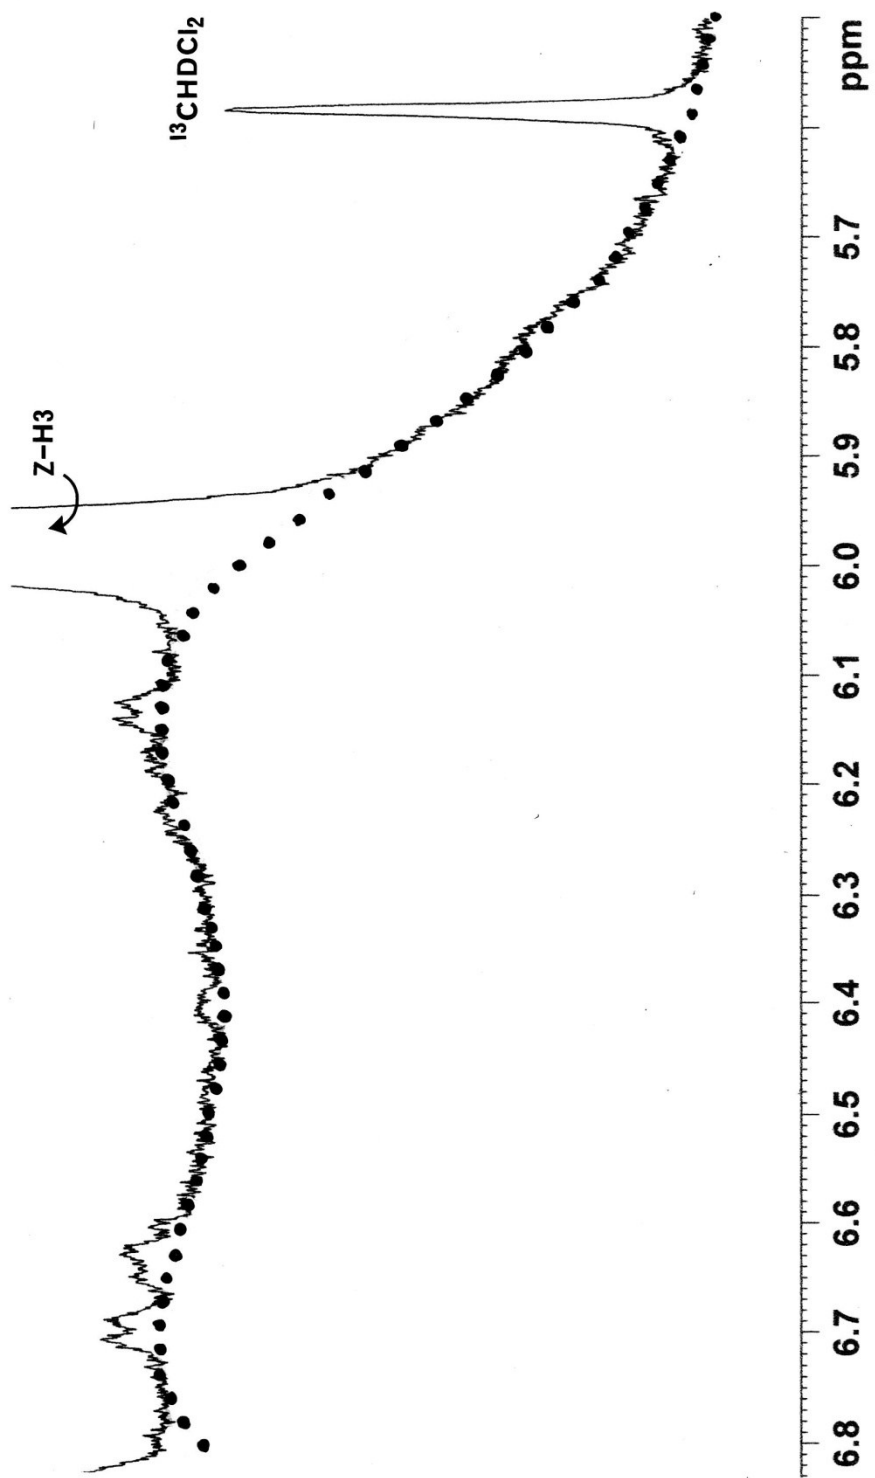

**Fig. S-6:** Experimental (-) and best fit computed (●) <sup>1</sup>H NMR lineshape of the exchange broadened imino phenyl 2Ho signal of **3-E** at -52 °C in CD<sub>2</sub>Cl<sub>2</sub> (500 MHz); k = 731 s<sup>-1</sup>.

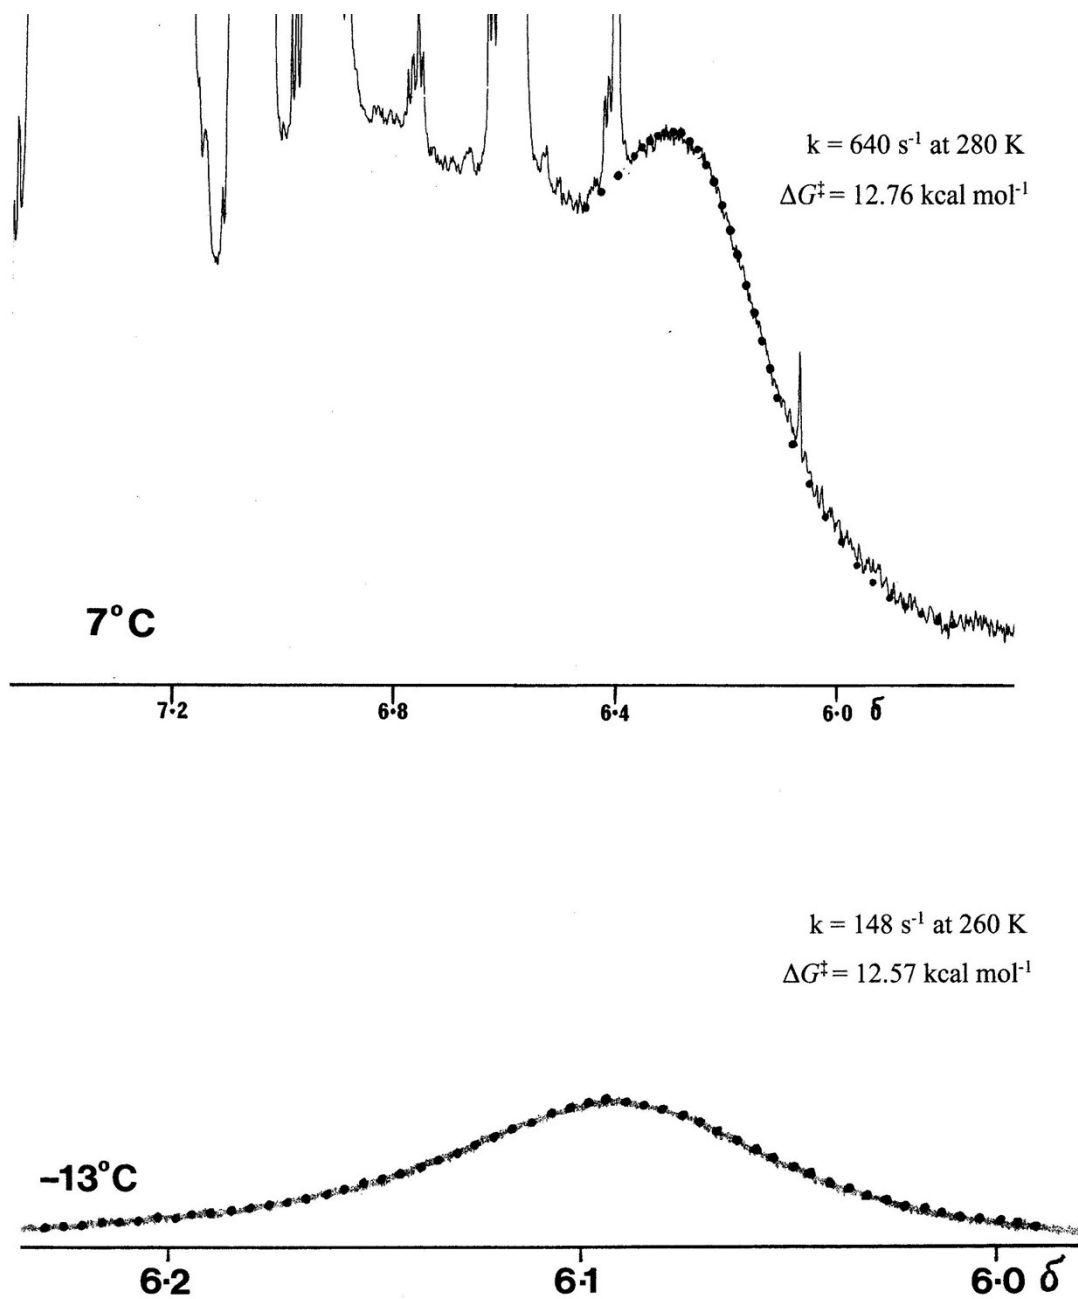

Combination of the above  $\Delta G^\ddagger$  data gives:  $\Delta H^\ddagger = 10.1 \pm 1.2 \text{ kcal mol}^{-1}$

$$\Delta S^\ddagger = -9.5 \pm 4 \text{ cal mol}^{-1} \text{ K}^{-1}$$

**Fig. S-7:** Experimental (-) and best fit computed (●)  $^1\text{H}$  NMR lineshapes of the exchange broadened imino phenyl 2Ho signal of **5-E** at -13 °C and 7 °C in  $\text{CD}_2\text{Cl}_2$  (500 MHz);  $k = 148 \text{ s}^{-1}$  and  $640 \text{ s}^{-1}$  respectively.

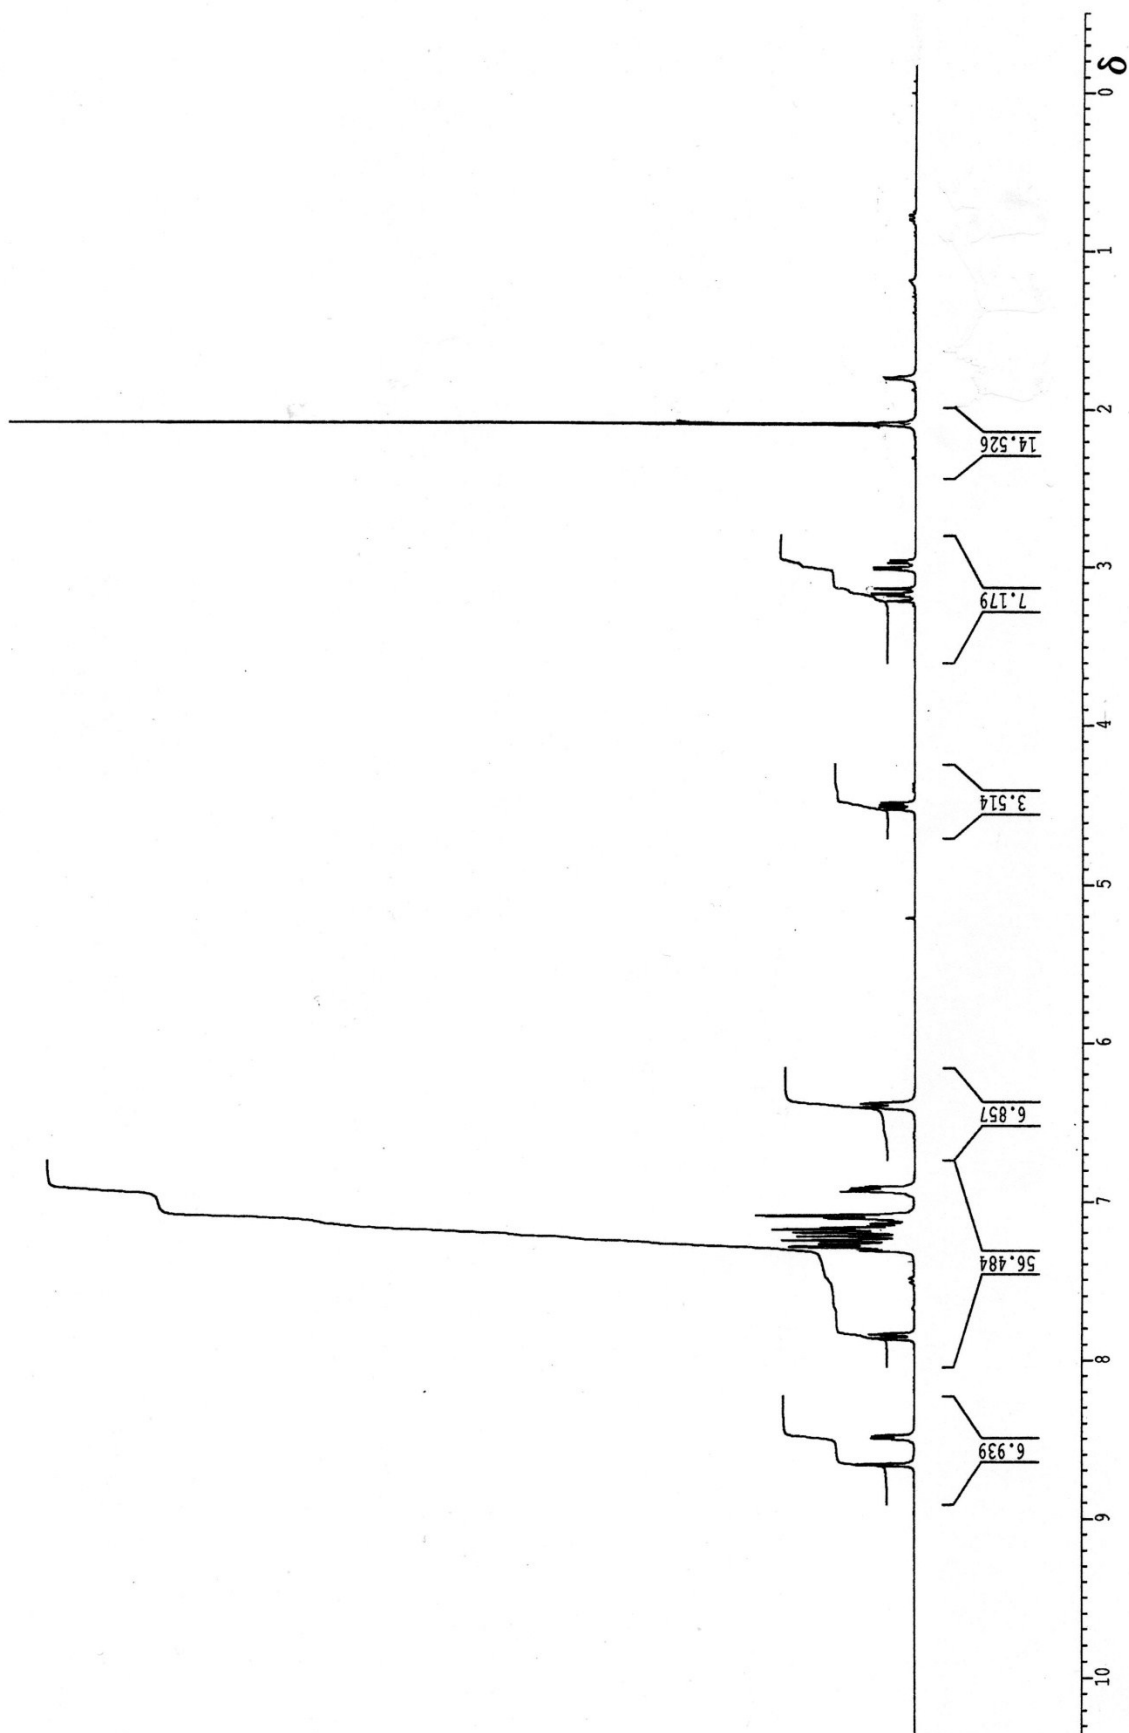

Fig. S-8:  $^1\text{H}$  NMR (300 MHz) of compound **1E** in  $\text{CDCl}_3$ .



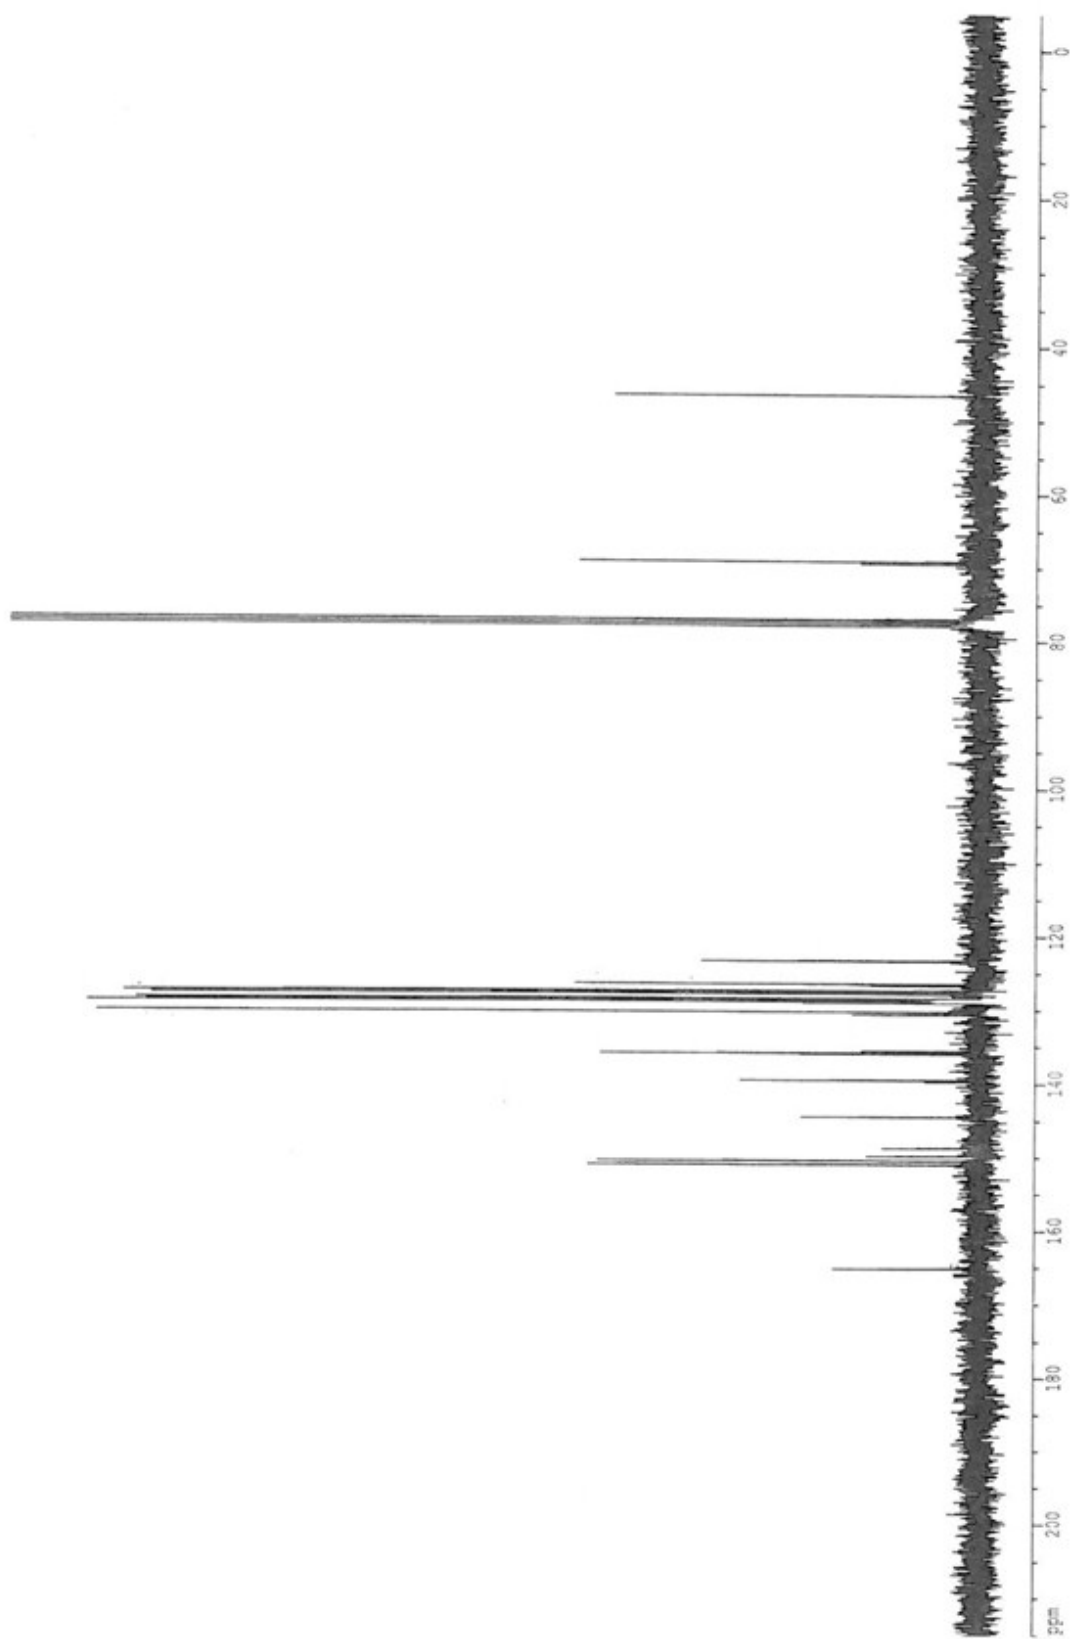

**Fig. S-9:**  $^{13}\text{C}$  NMR (75.4 MHz) of compound **1** (*E* and *Z*) in  $\text{CDCl}_3$ .

Sample Report (continued):

| Peak ID | Compound Found | Time | Mass Found |
|---------|----------------|------|------------|
| 1       |                | 0.53 | 362.00     |

1: Combine (3:24-27:29)

1:MS ES+  
7.0e+007

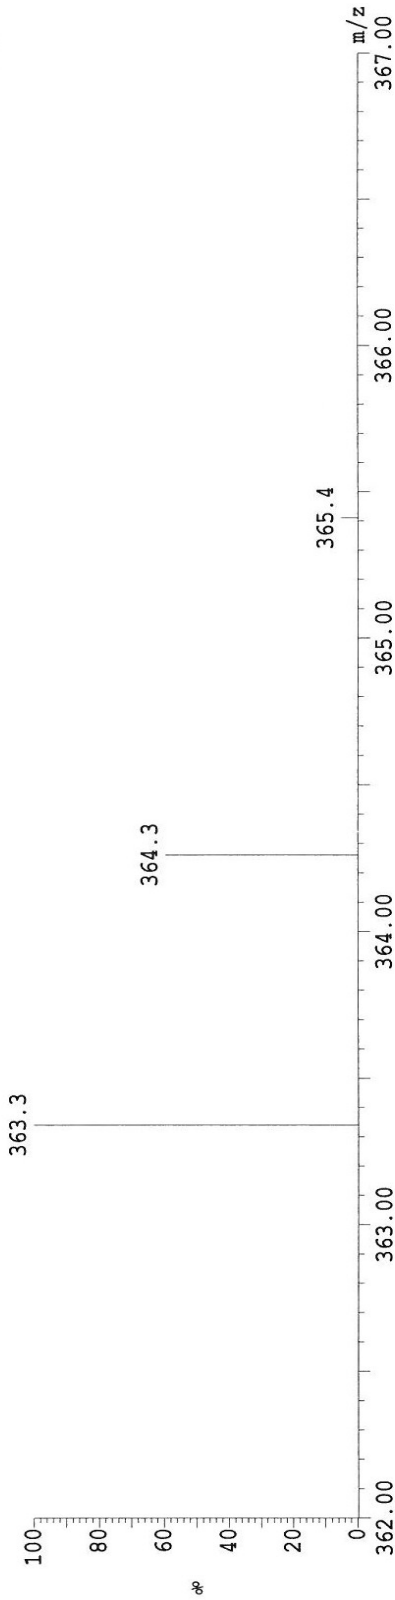

| Peak ID | Compound Found | Time | Mass Found |
|---------|----------------|------|------------|
| 1       |                | 0.53 | 362.00     |

1: Combine (3:23-27:28)

2:MS ES-  
8.3e+004

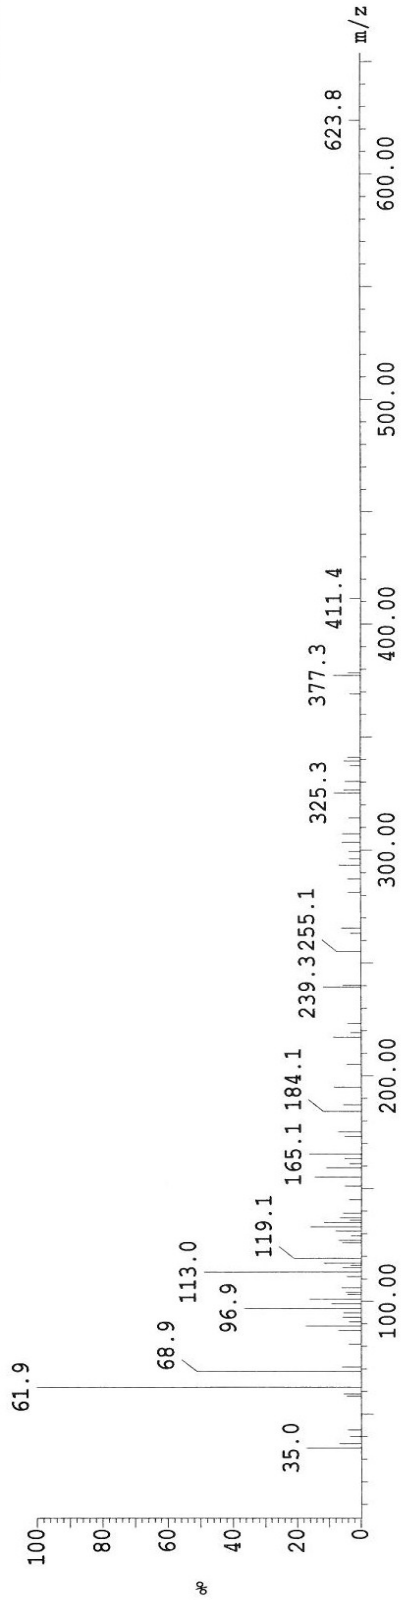

Fig. S-10: Mass Spectrum of compound 1.

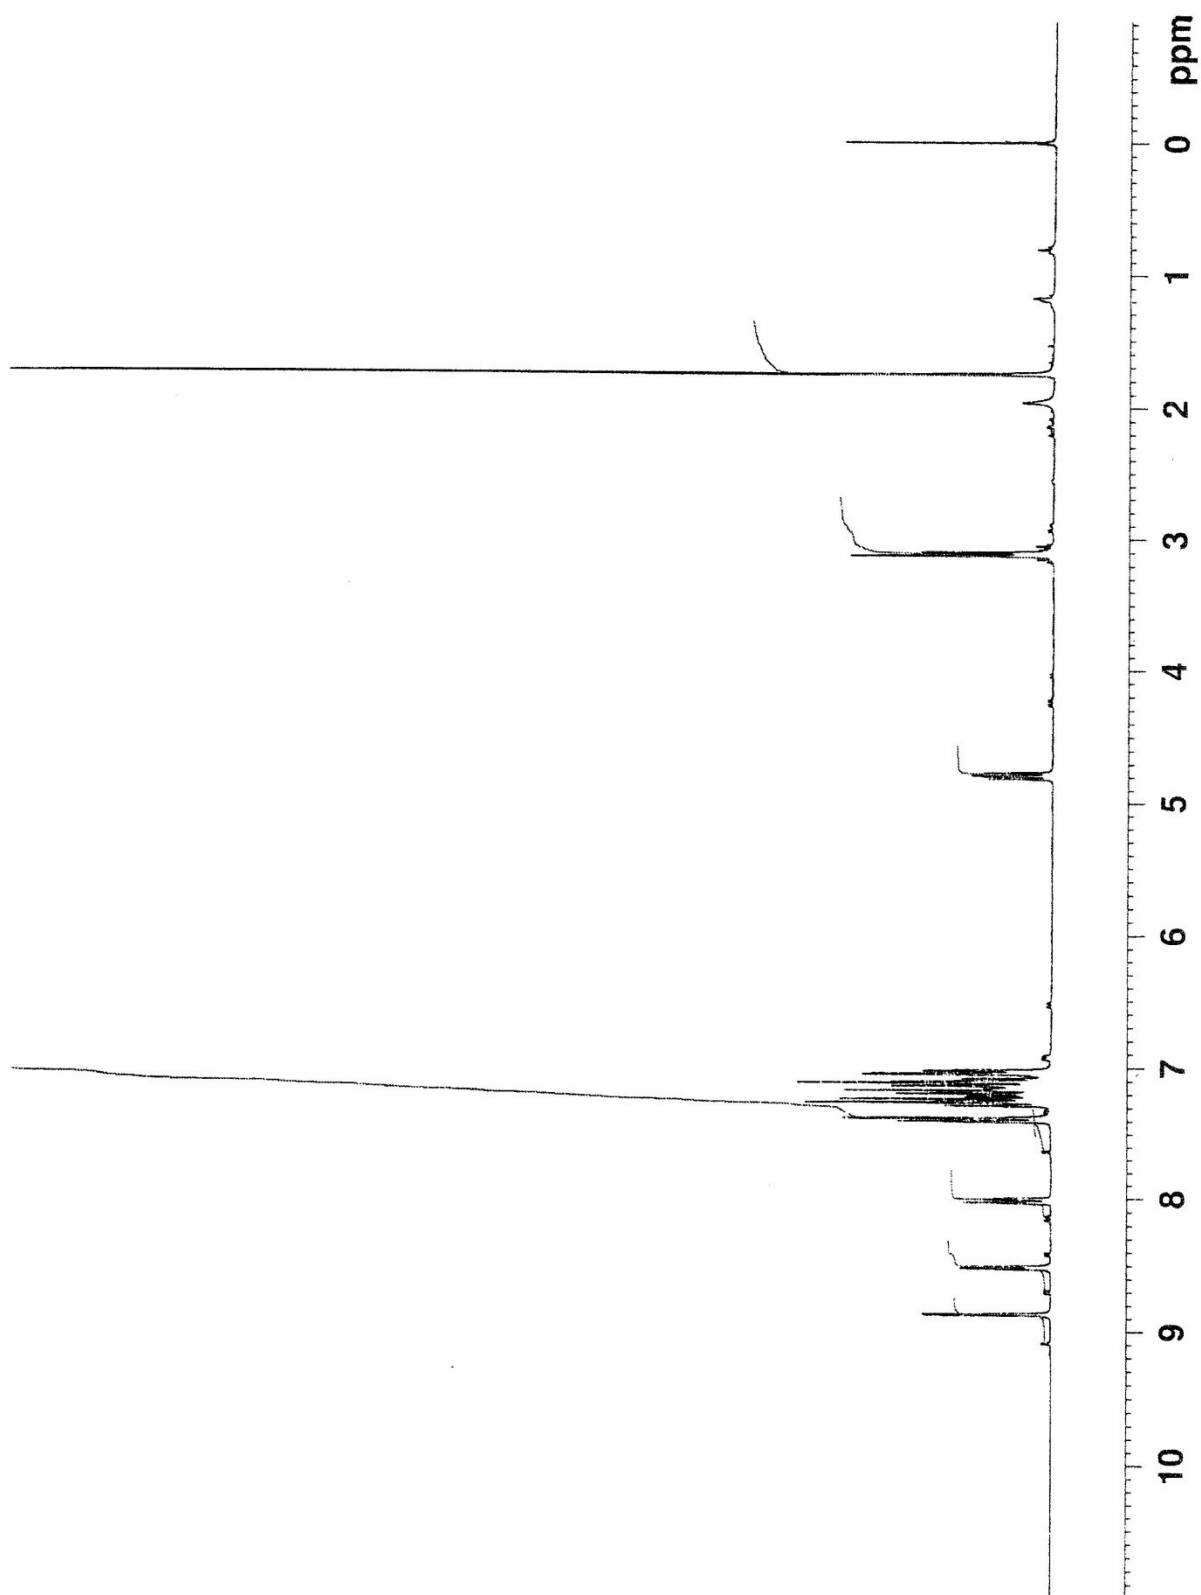

**Fig. S-11:**  $^1\text{H}$  NMR (300 MHz) of compound **2** in  $\text{CDCl}_3$ .

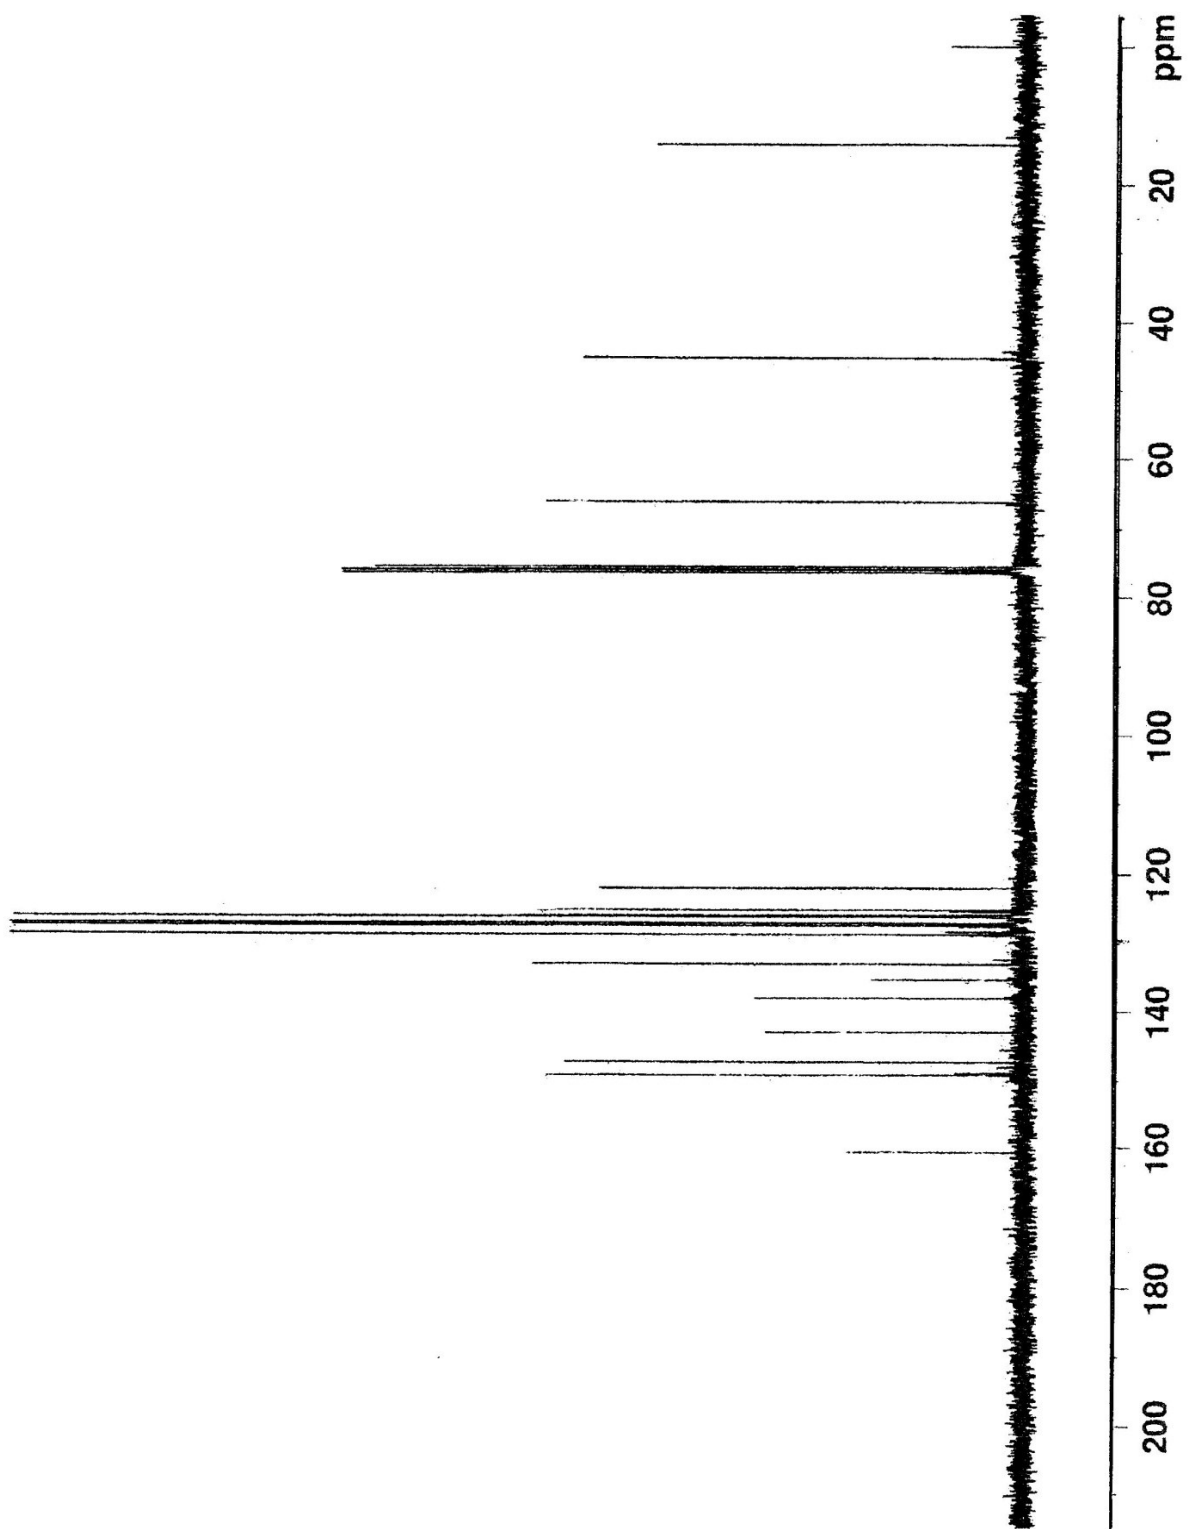

**Fig. S-12:**  $^{13}\text{C}$  NMR (75.4 MHz) of compound **2** in  $\text{CDCl}_3$ .

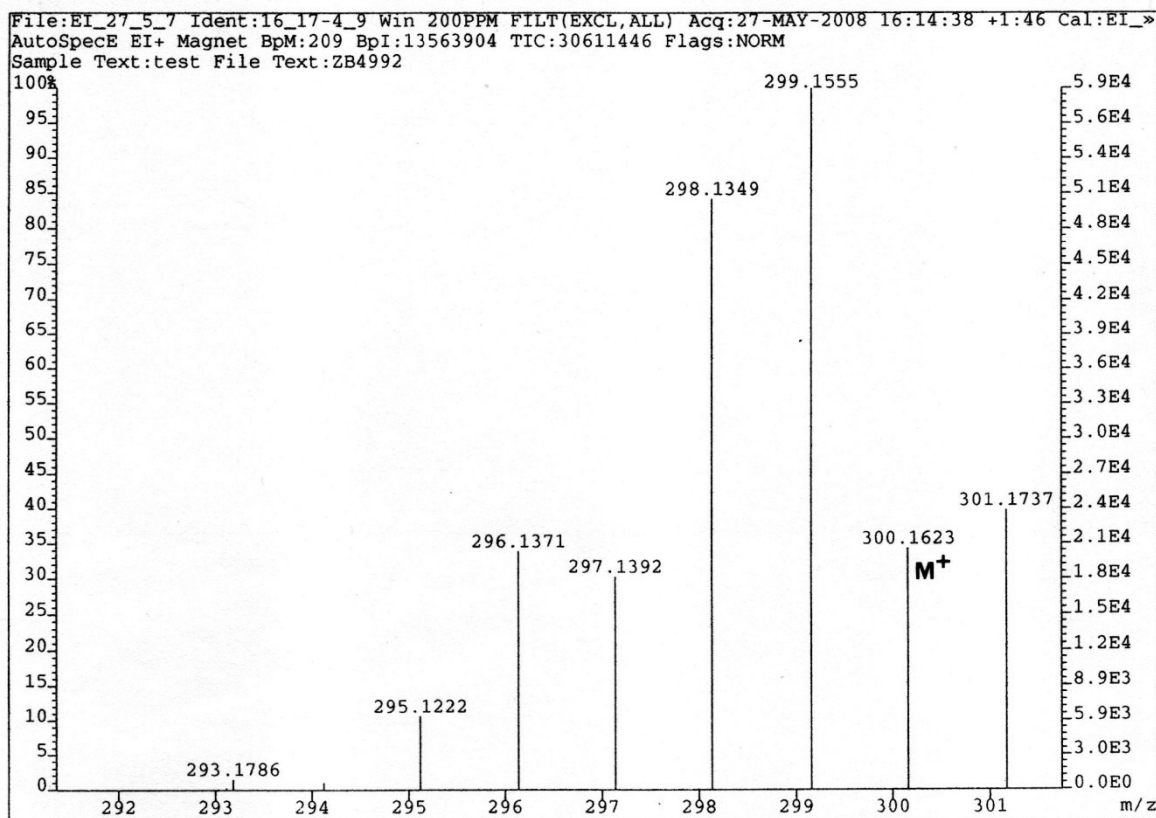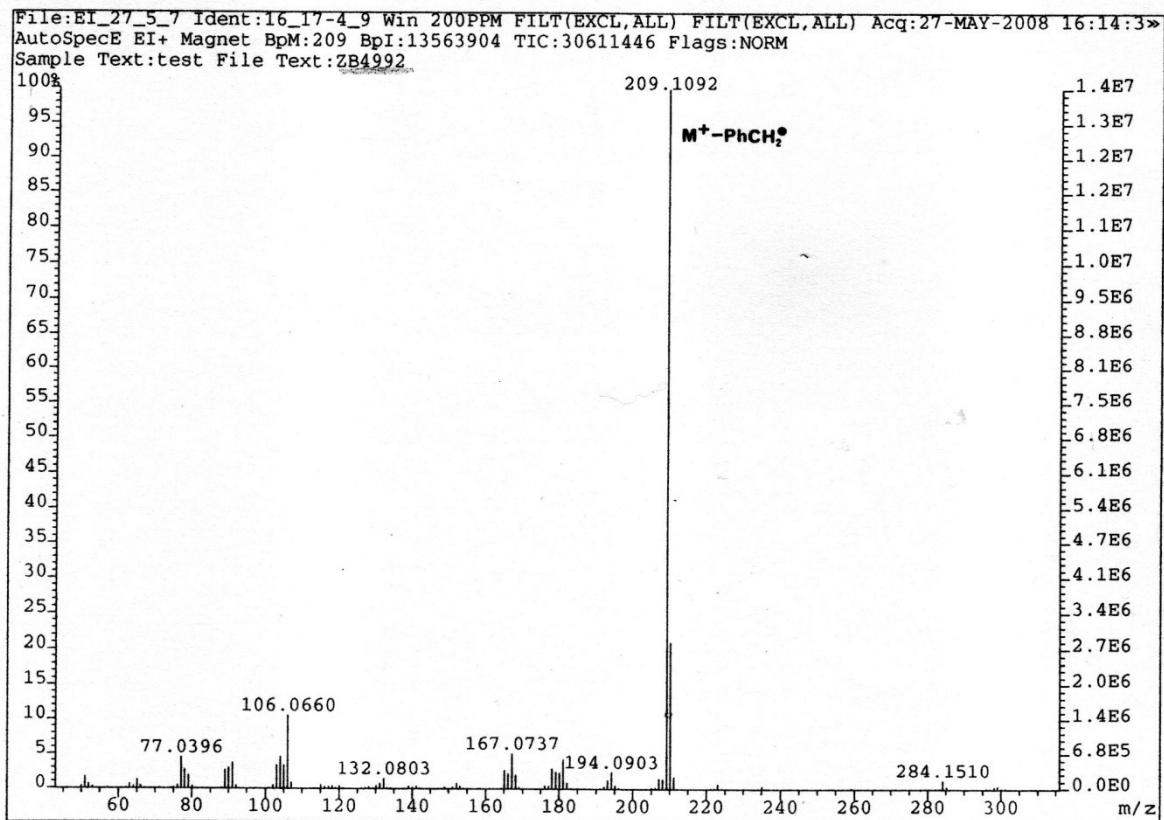

Fig. S-13: Mass Spectrum of compound 2.

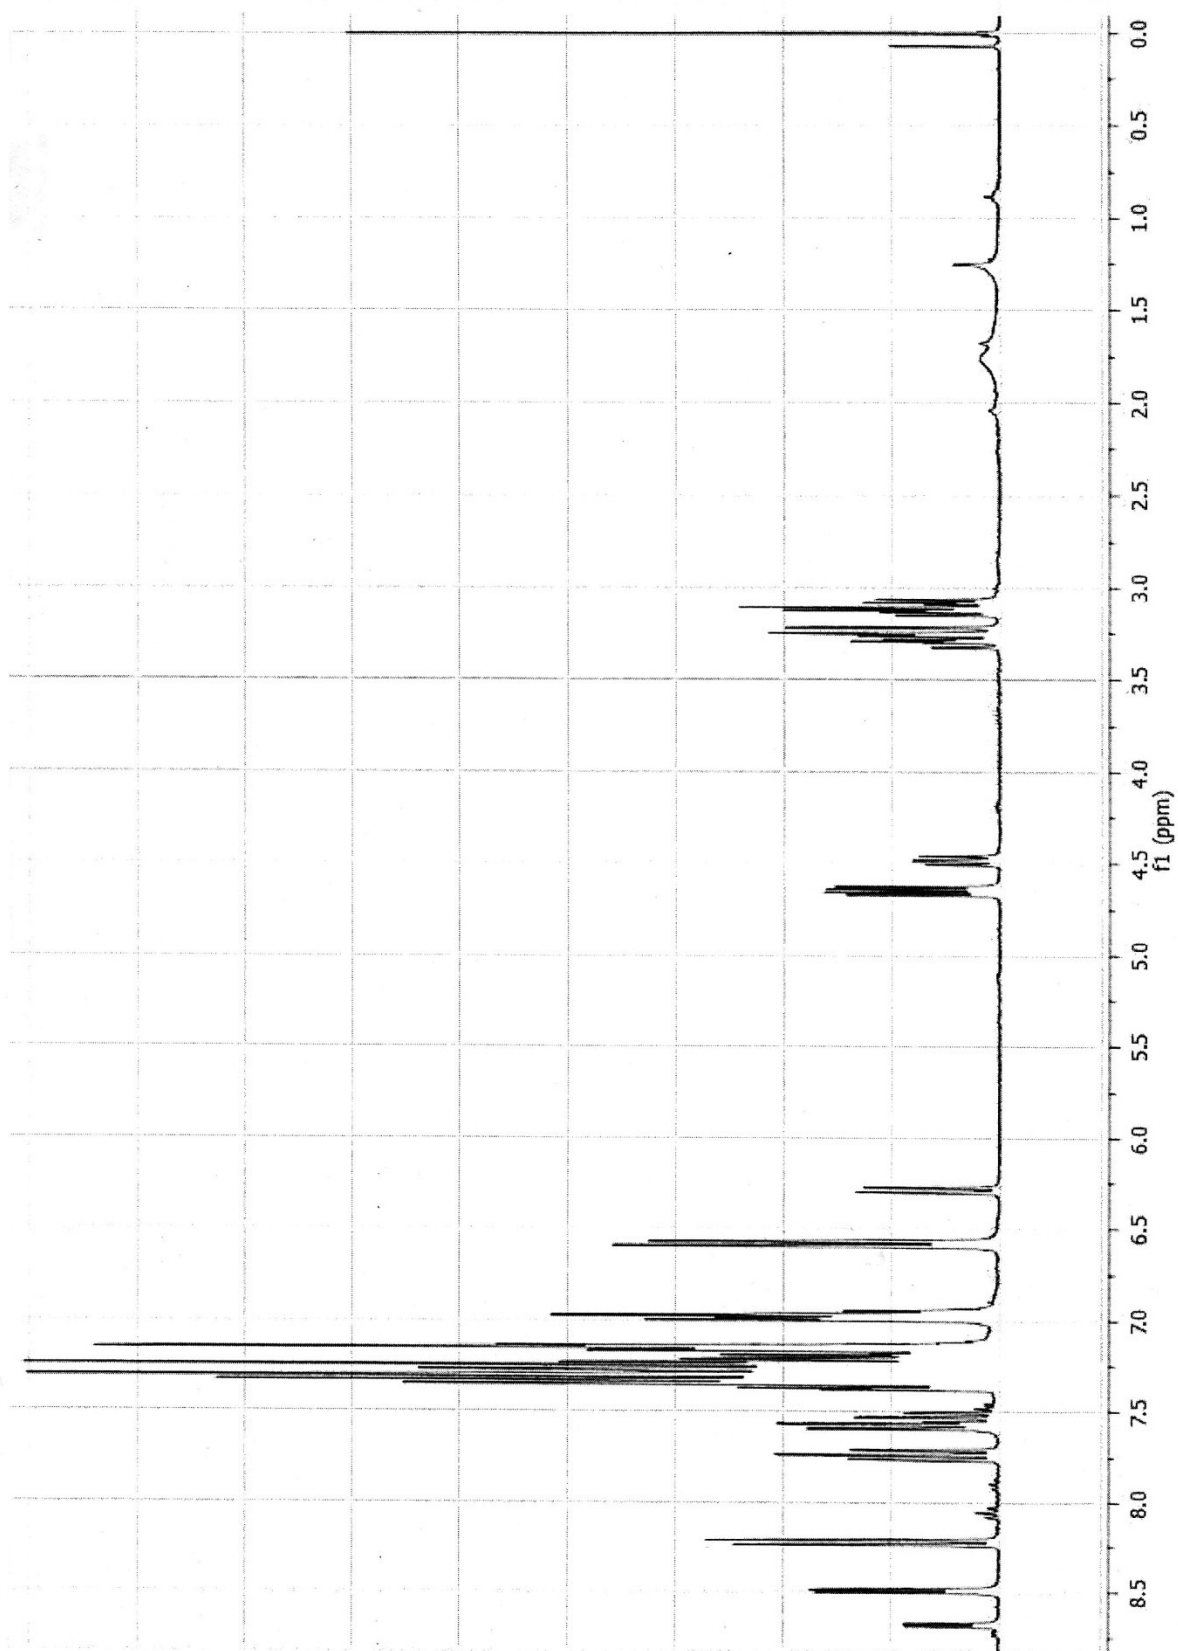

**Fig. S-14:**  $^1\text{H}$  NMR (300 MHz) of compound 3 (*E* and *Z*) in  $\text{CDCl}_3$ .

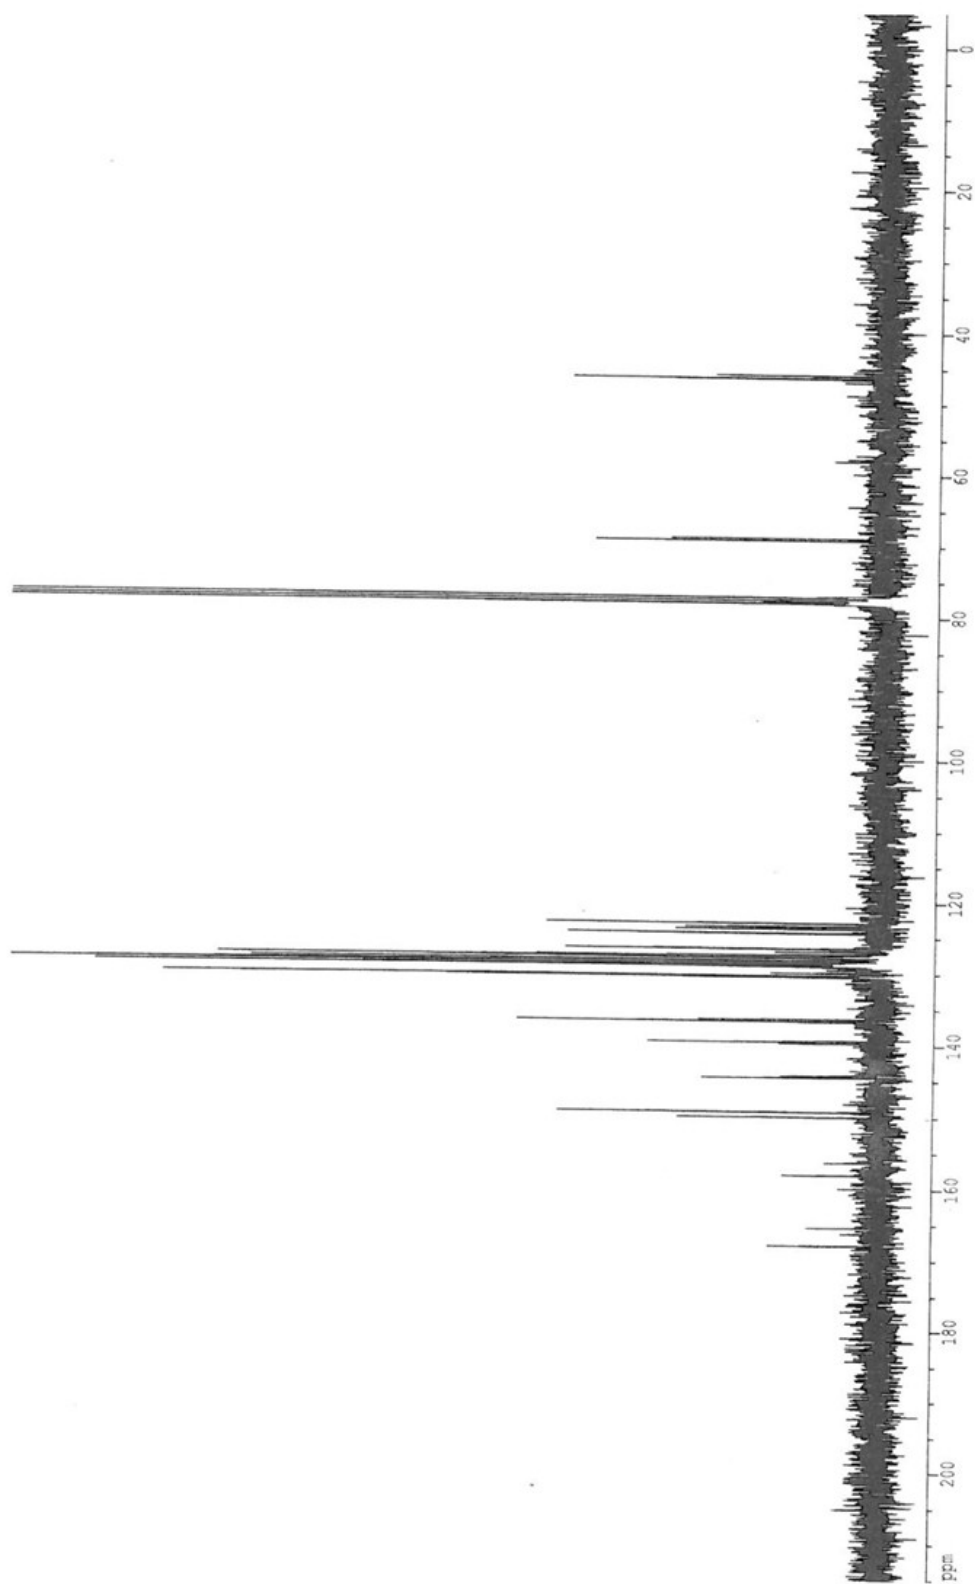

**Fig. S-15:**  $^{13}\text{C}$  NMR (75.4 MHz) of compound **3** (*E* and *Z*) in  $\text{CDCl}_3$ .

### Single Mass Analysis

Tolerance = 10.0 PPM / DBE: min = -1.5, max = 50.0

Selected filters: None

Monoisotopic Mass, Even Electron Ions

305 formula(e) evaluated with 3 results within limits (all results up to 1000) for each mass

Elements Used:

C: 0-50 H: 0-50 N: 0-5 O: 0-5 Na: 0-1

EG 5

H<sub>L</sub>1199 15 (0.630) Cm (11:26)

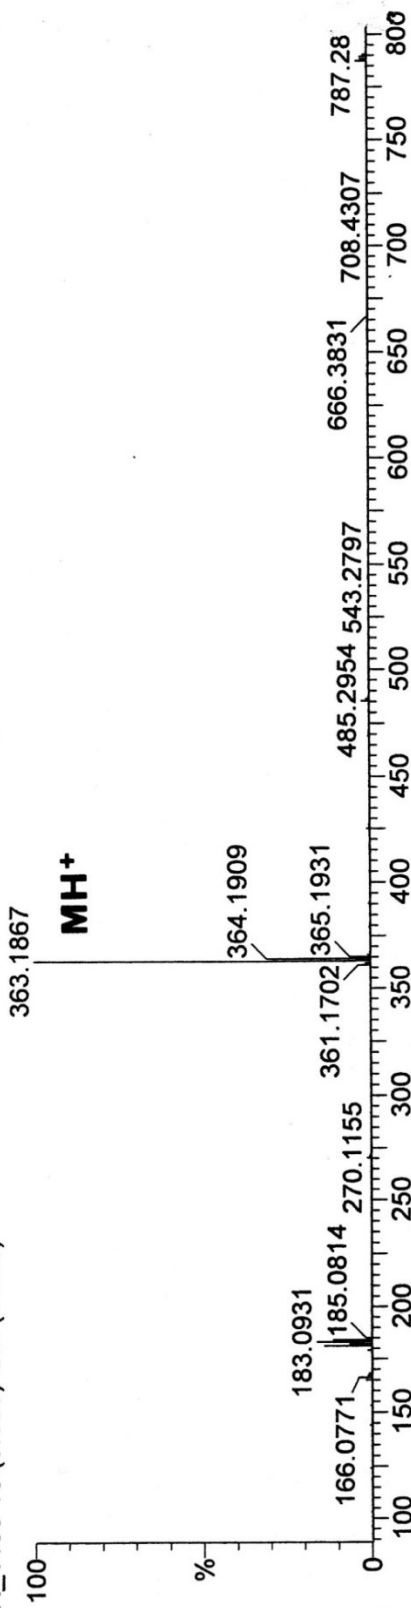

Minimum:  
Maximum:

-1.5  
50.0

| Mass     | Calc. Mass | mDa  | PPM  | DBE  | i-FIT   | Formula          |
|----------|------------|------|------|------|---------|------------------|
| 363.1867 | 363.1861   | 0.6  | 1.7  | 16.5 | 1543.9  | C26 H23 N2       |
|          | 363.1896   | -2.9 | -8.0 | 4.5  | 17461.8 | C17 H28 N2 O5 Na |
|          | 363.1837   | 3.0  | 8.3  | 13.5 | 3938.5  | C24 H24 N2 Na    |



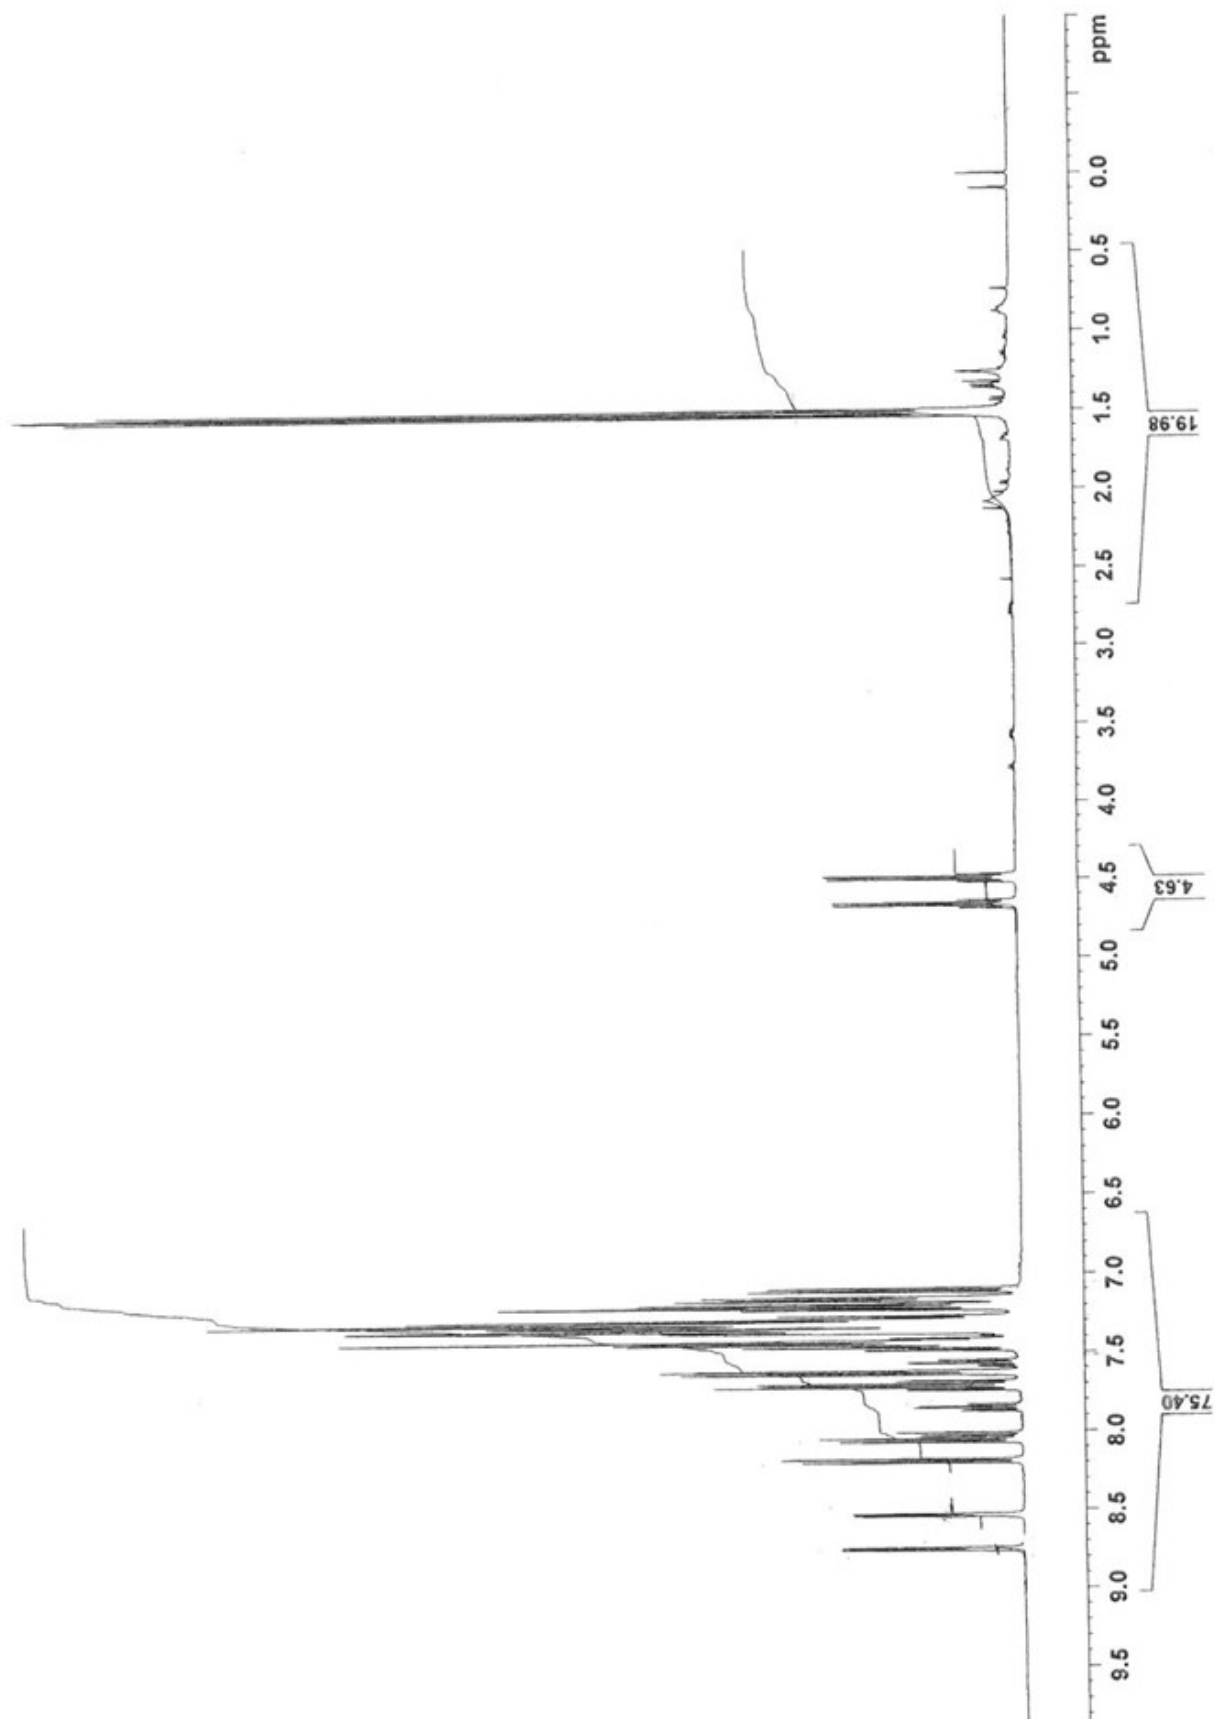

Fig. S-17: <sup>1</sup>H NMR (300 MHz) of compound 4 (*E* and *Z*) in CDCl<sub>3</sub>.

**Single Mass Analysis**

Tolerance = 10.0 PPM / DBE: min = -1.5, max = 50.0

Selected filters: None

Monoisotopic Mass, Even Electron Ions

255 formula(e) evaluated with 2 results within limits (all results (up to 1000) for each mass)

Elements Used:

C: 0-50 H: 0-50 N: 0-5 O: 0-5 Na: 0-1

EG 4

H<sub>2</sub> 1198 15 (0.630) Cm (10:32)

184.0789

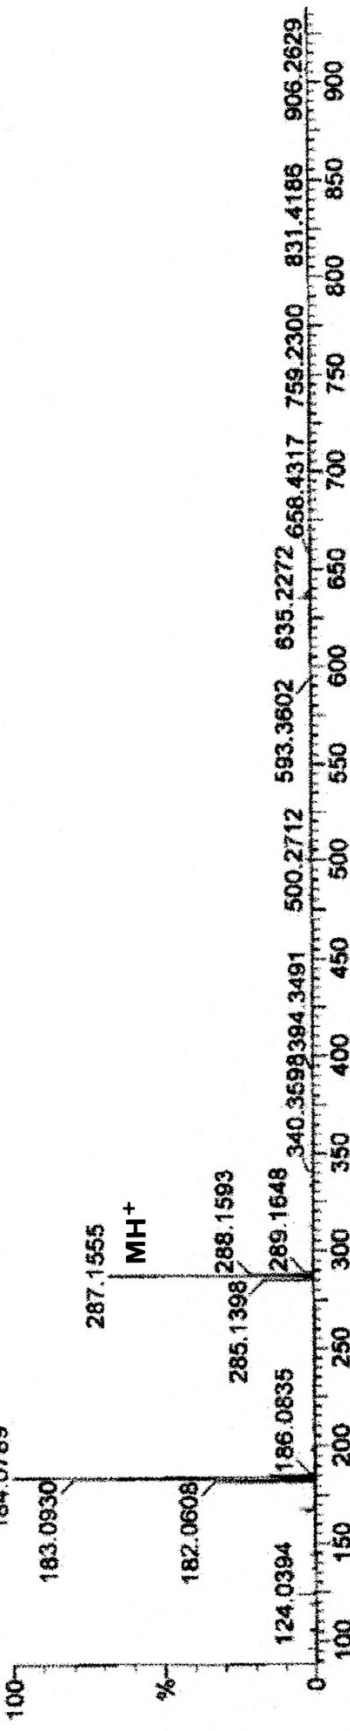

Minimum: -1.5  
Maximum: 50.0

| Mass     | Calc. Mass | mDa  | PFM  | DBE  | i-FIT  | Formula          |
|----------|------------|------|------|------|--------|------------------|
| 287.1555 | 287.1548   | 0.7  | 2.4  | 12.5 | 1069.7 | C20 H19 N2       |
| 287.1583 | 287.1583   | -2.8 | -9.8 | 0.5  | 5204.6 | C11 H24 N2 O5 Na |

Fig. S-18: Mass Spectrum of compound 4.

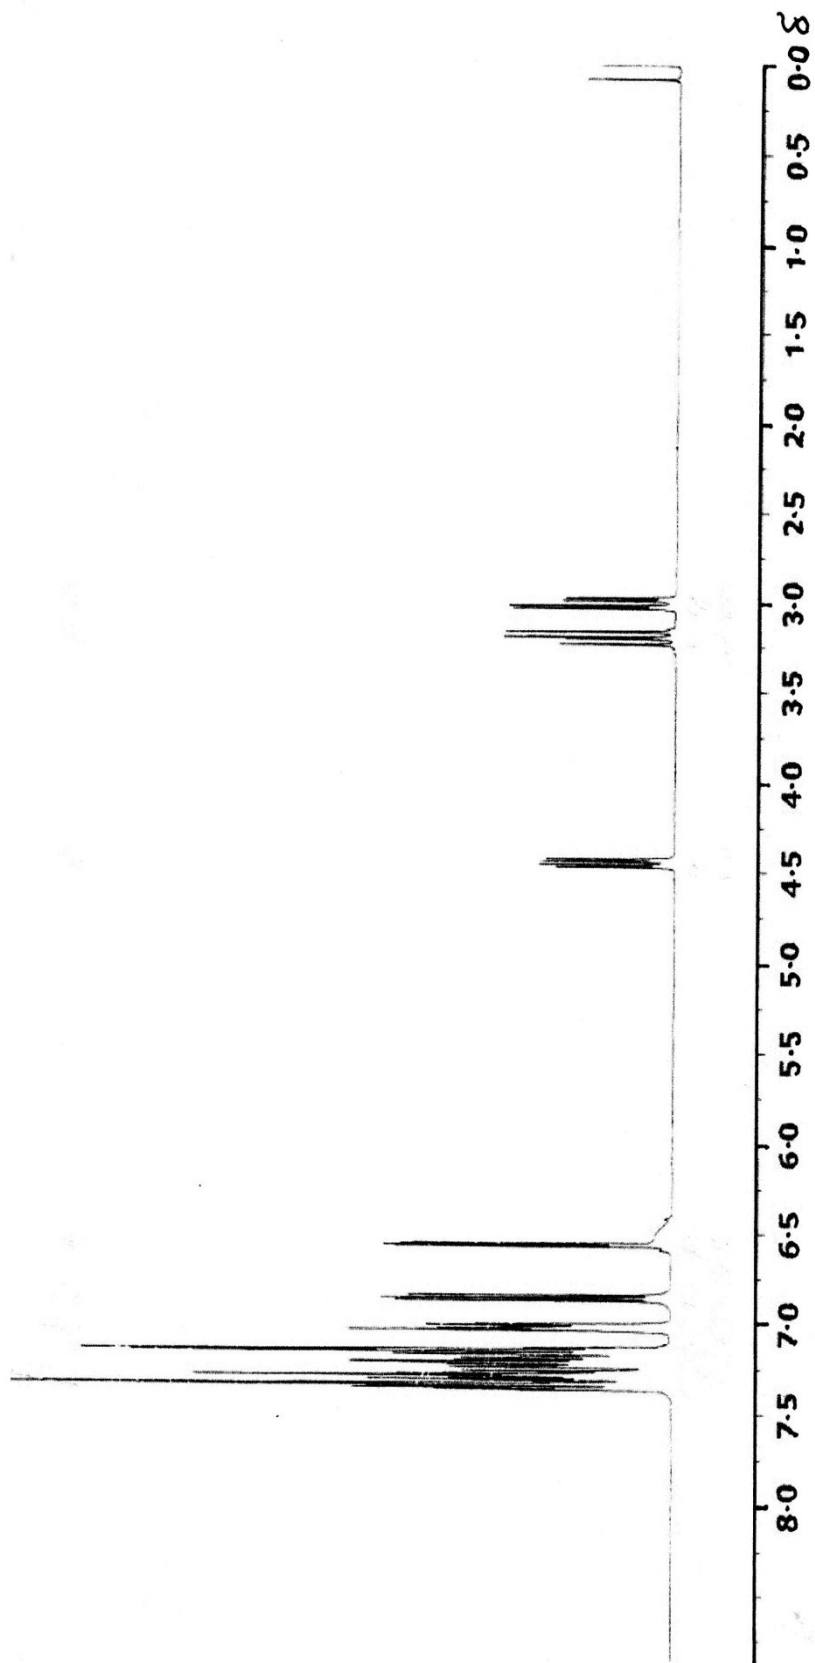

Fig. S-19:  $^1\text{H}$  NMR (300 MHz) of compound **5** in  $\text{CDCl}_3$ .

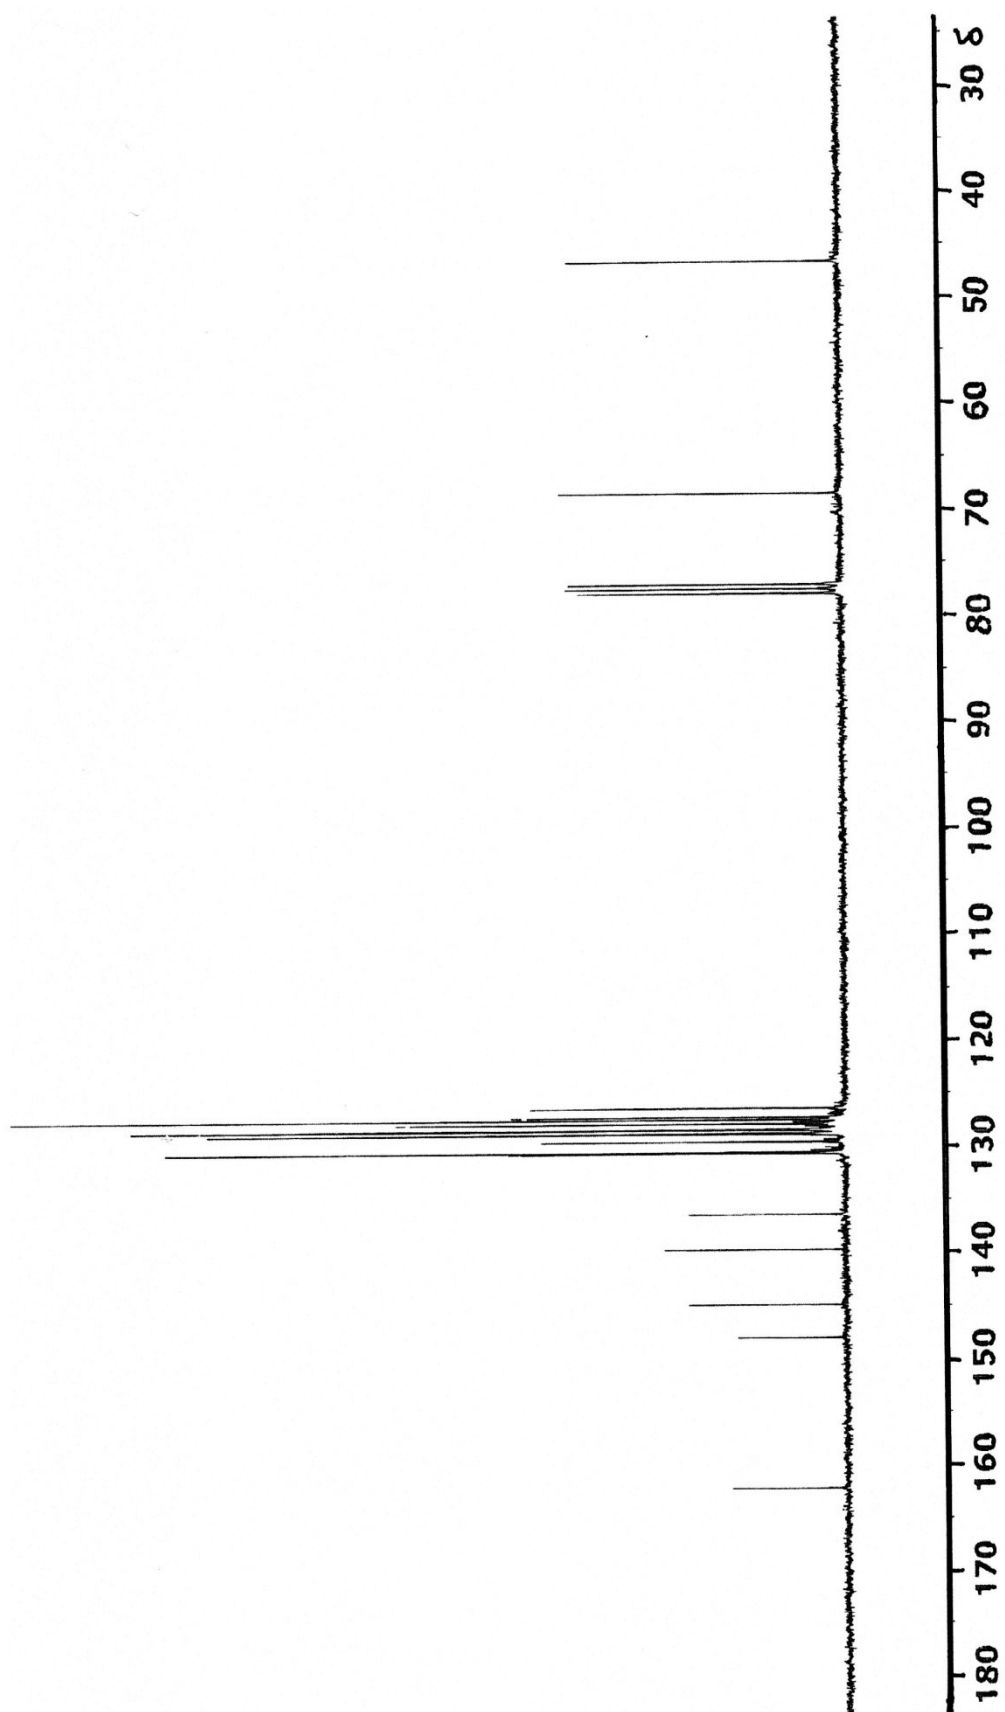

Fig. S-20:  $^{13}\text{C}$  NMR (74.5 MHz) of compound 5 in  $\text{CDCl}_3$ .

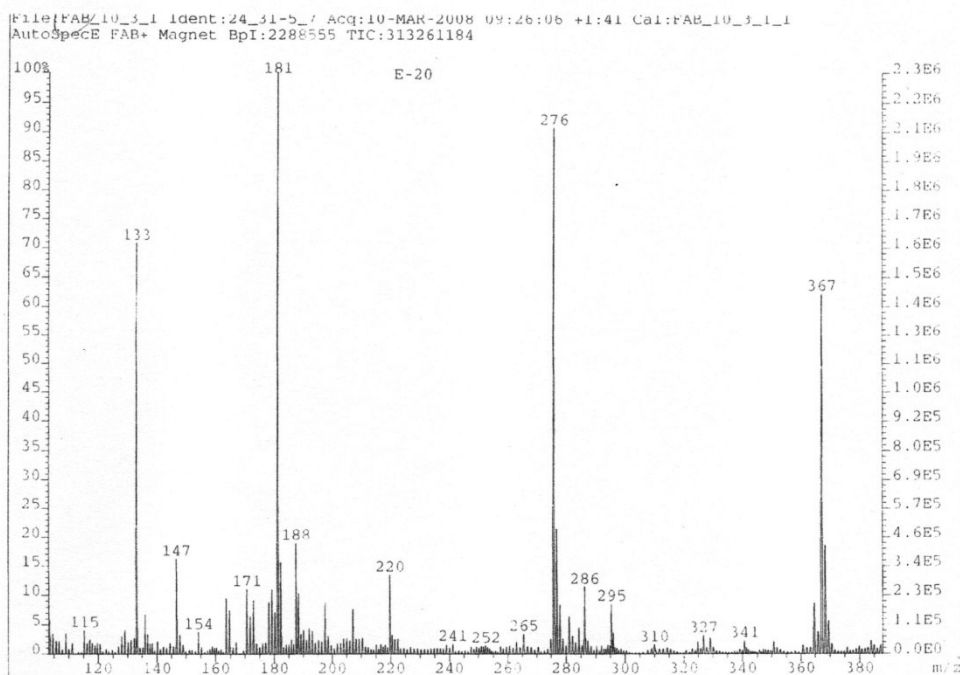

**Elemental Composition**

File: FAB\_10\_3\_4 Ident: 8\_9 SMD(1,7) PKD(7,3,7,0.01%,10.0,10.00%,F,F)  
 AutoSpecE FAB+ Voltage BpI: 61720 TIC: 897347 Flags: NORM  
 File Text: E-20

Heteroatom Max: 30 Ion: Both Even and Odd  
 Limits:

|         |       |      |  |  |      |    |    |   |   |
|---------|-------|------|--|--|------|----|----|---|---|
| 364.425 | 0.0   |      |  |  | -0.5 | 0  | 0  | 0 | 0 |
| 369.971 | 100.0 | 10.0 |  |  | 20.0 | 25 | 22 | 1 | 1 |

| Mass       | %RA | mDa  | PEM  | Calc. Mass | DBE  | C  | H  | N | S |
|------------|-----|------|------|------------|------|----|----|---|---|
| 368.147577 | 2.4 | -0.3 | -0.8 | 368.147297 | 15.5 | 25 | 22 | 1 | 1 |

**Statistic calculations**

|      | mDa   | PEM   | n |
|------|-------|-------|---|
| Mean | -0.28 | -0.76 | 1 |
| RMS  | 0.28  | 0.76  |   |

**Fig. S-21: Mass Spectrum of compound 5.**

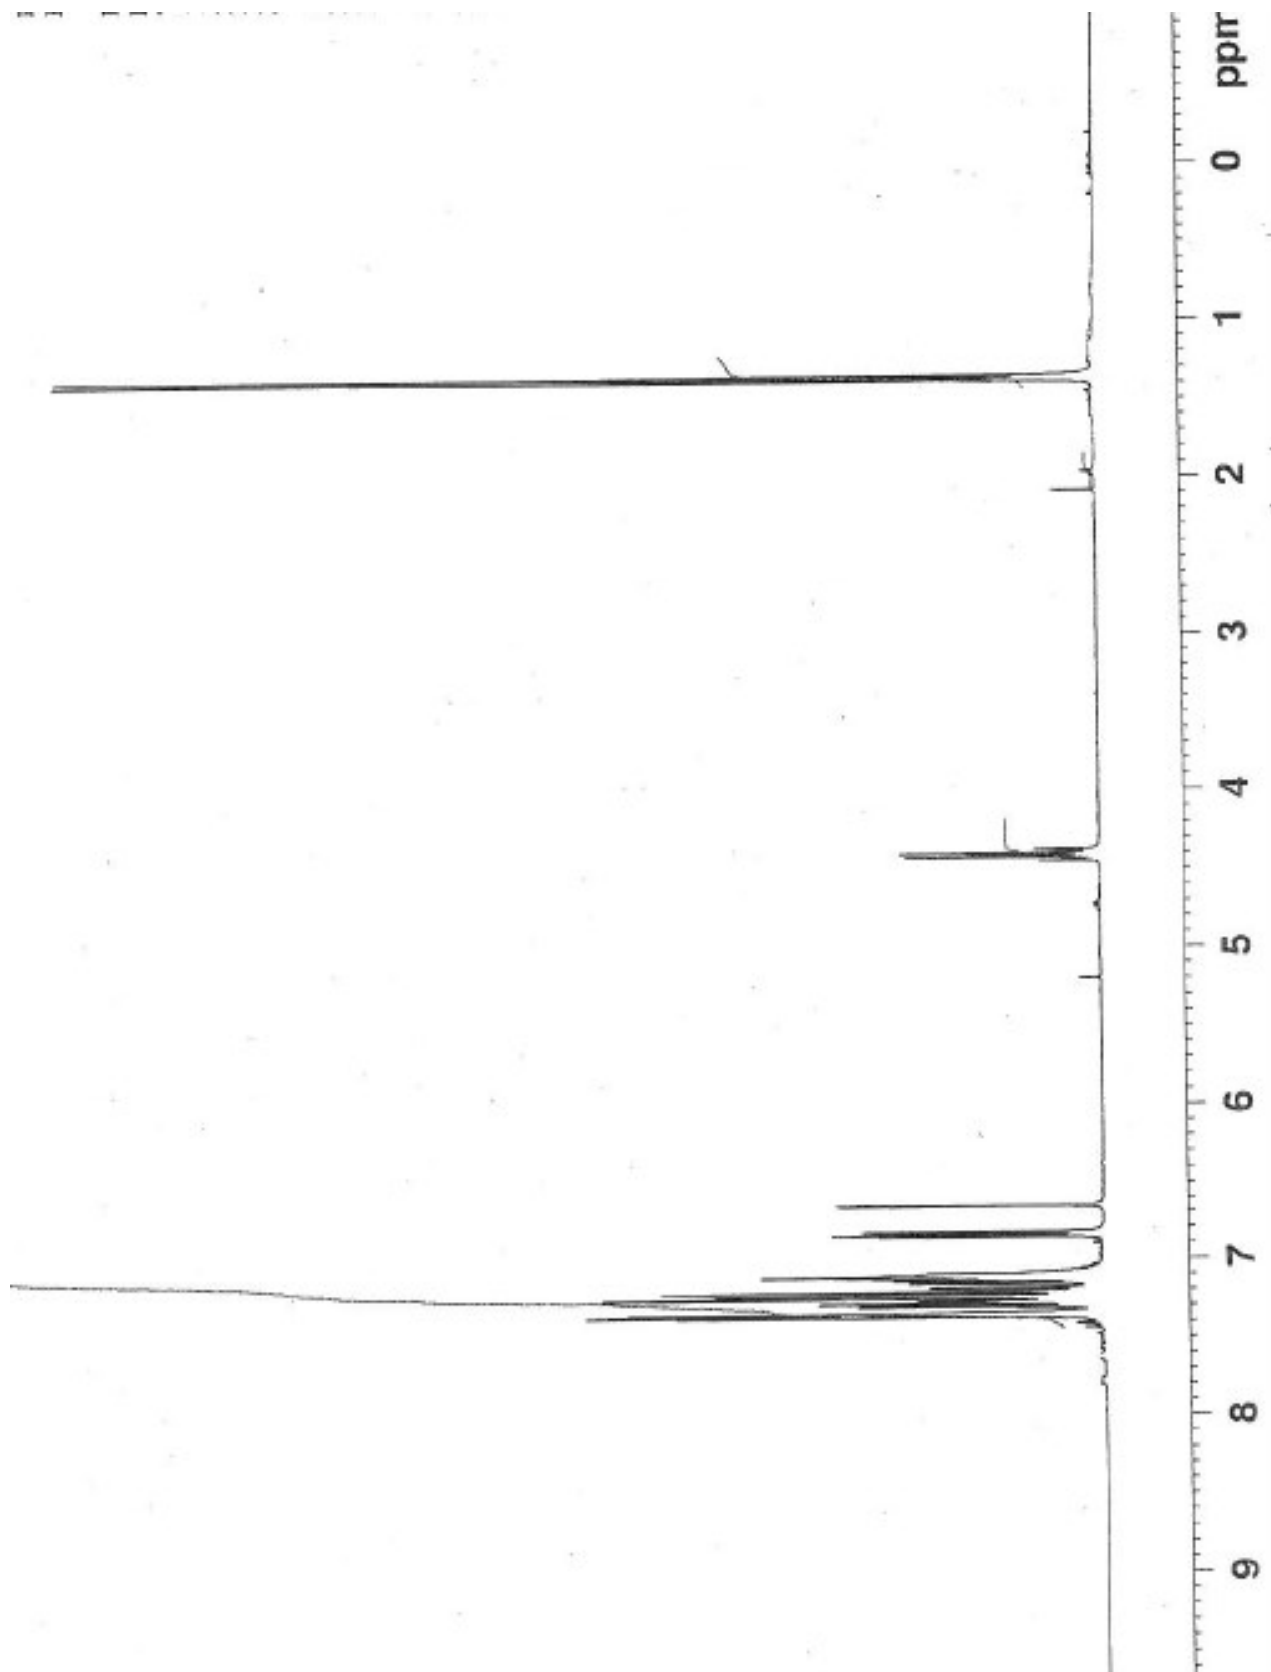

**Fig. S-22:**  $^1\text{H}$  NMR (300 MHz) of compound **6** in  $\text{CDCl}_3$ .

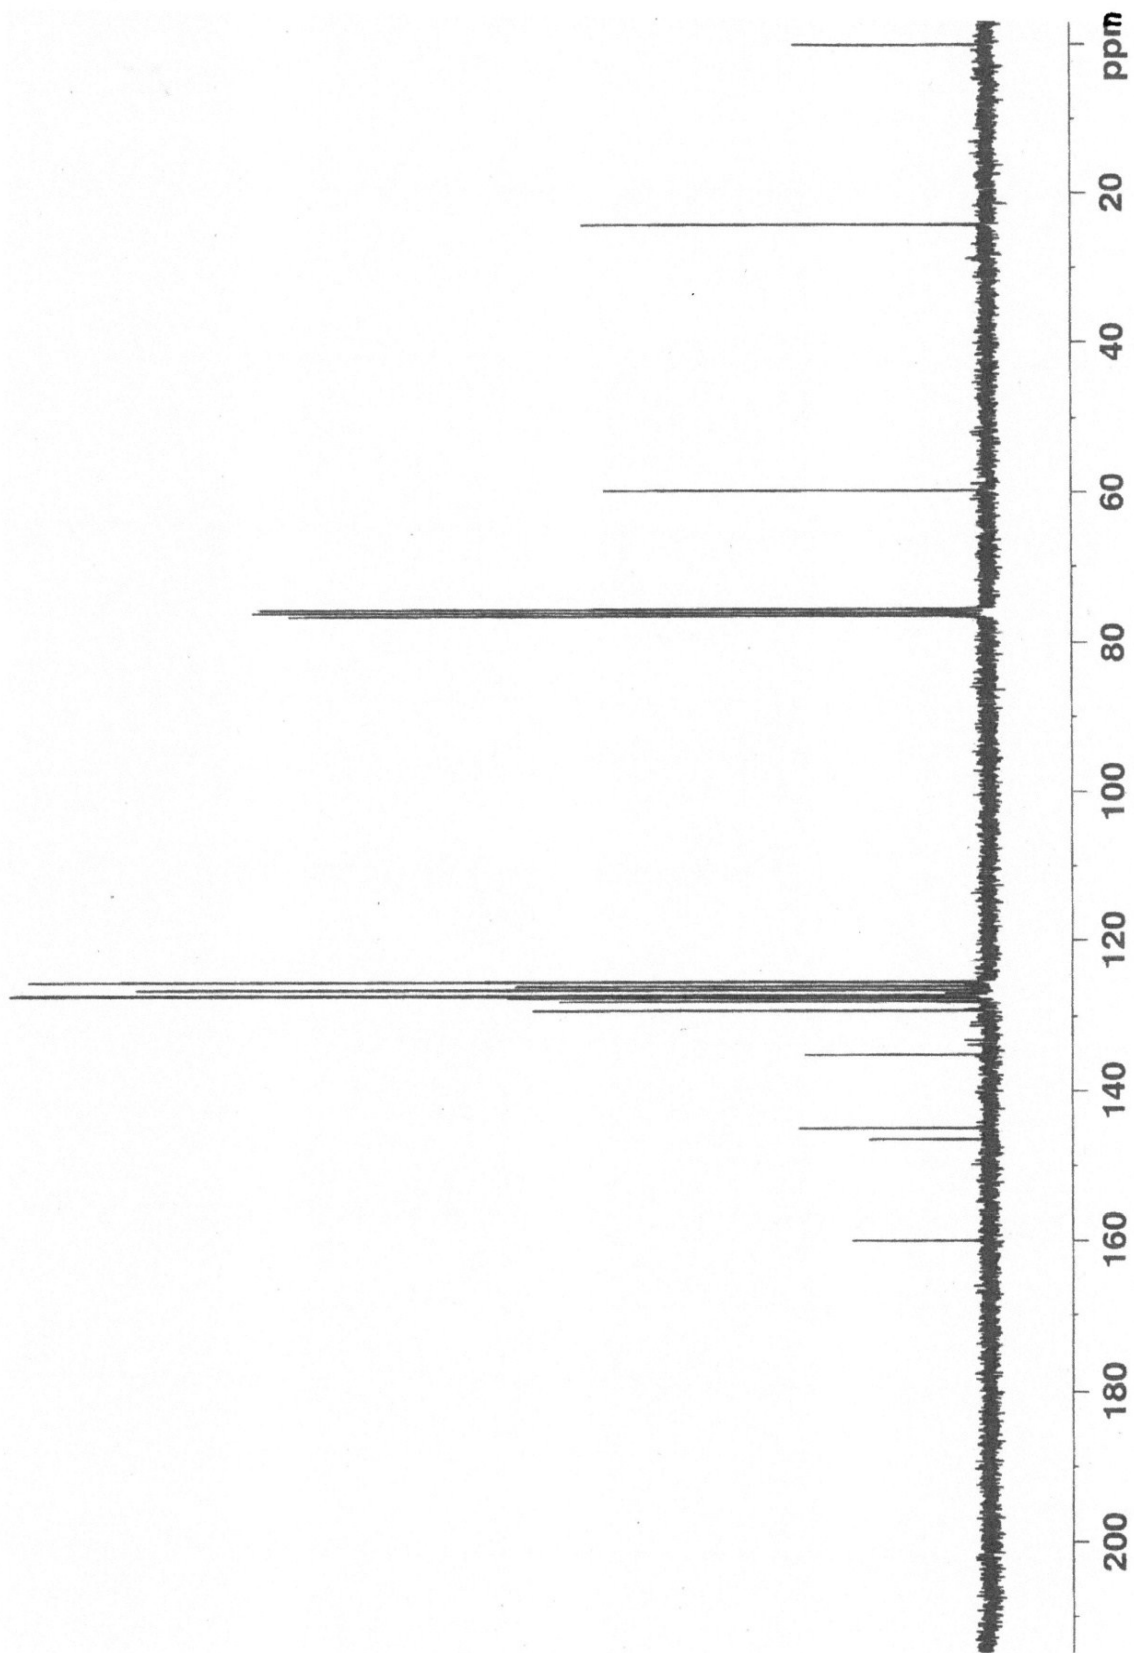

**Fig. S-23:**  $^{13}\text{C}$  NMR (75.4 MHz) of compound 6 in  $\text{CDCl}_3$ .

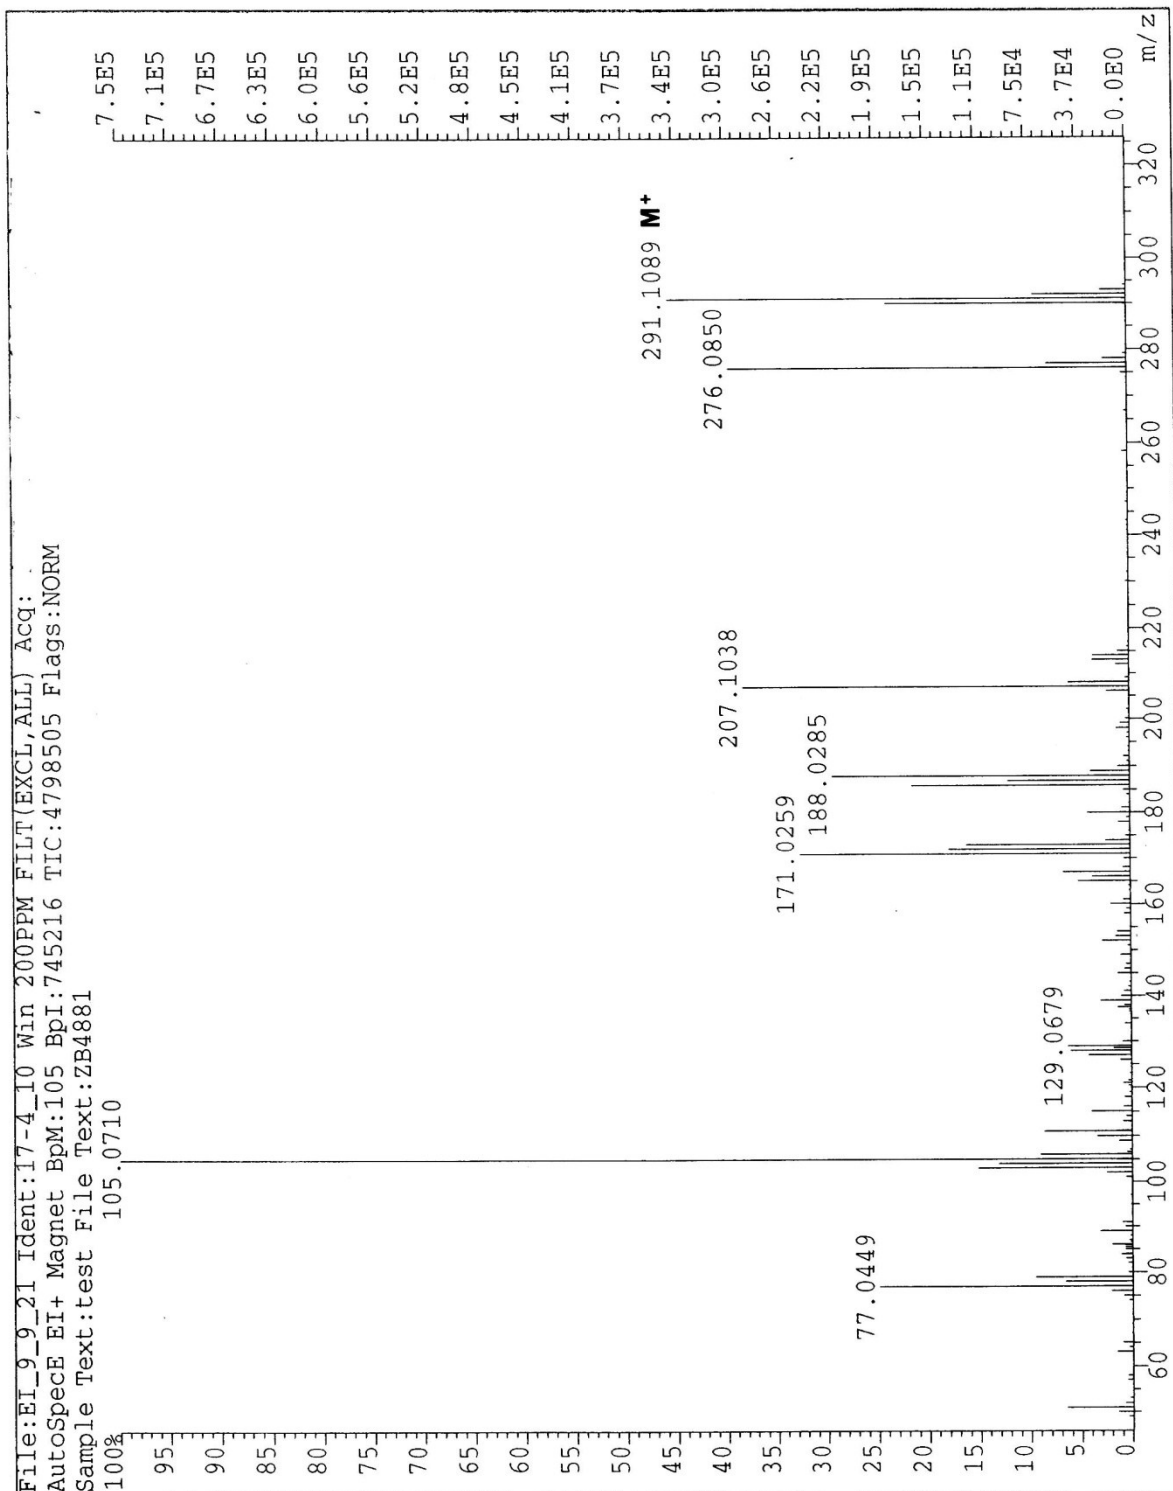

Fig. S-24: Mass Spectrum of compound 6.



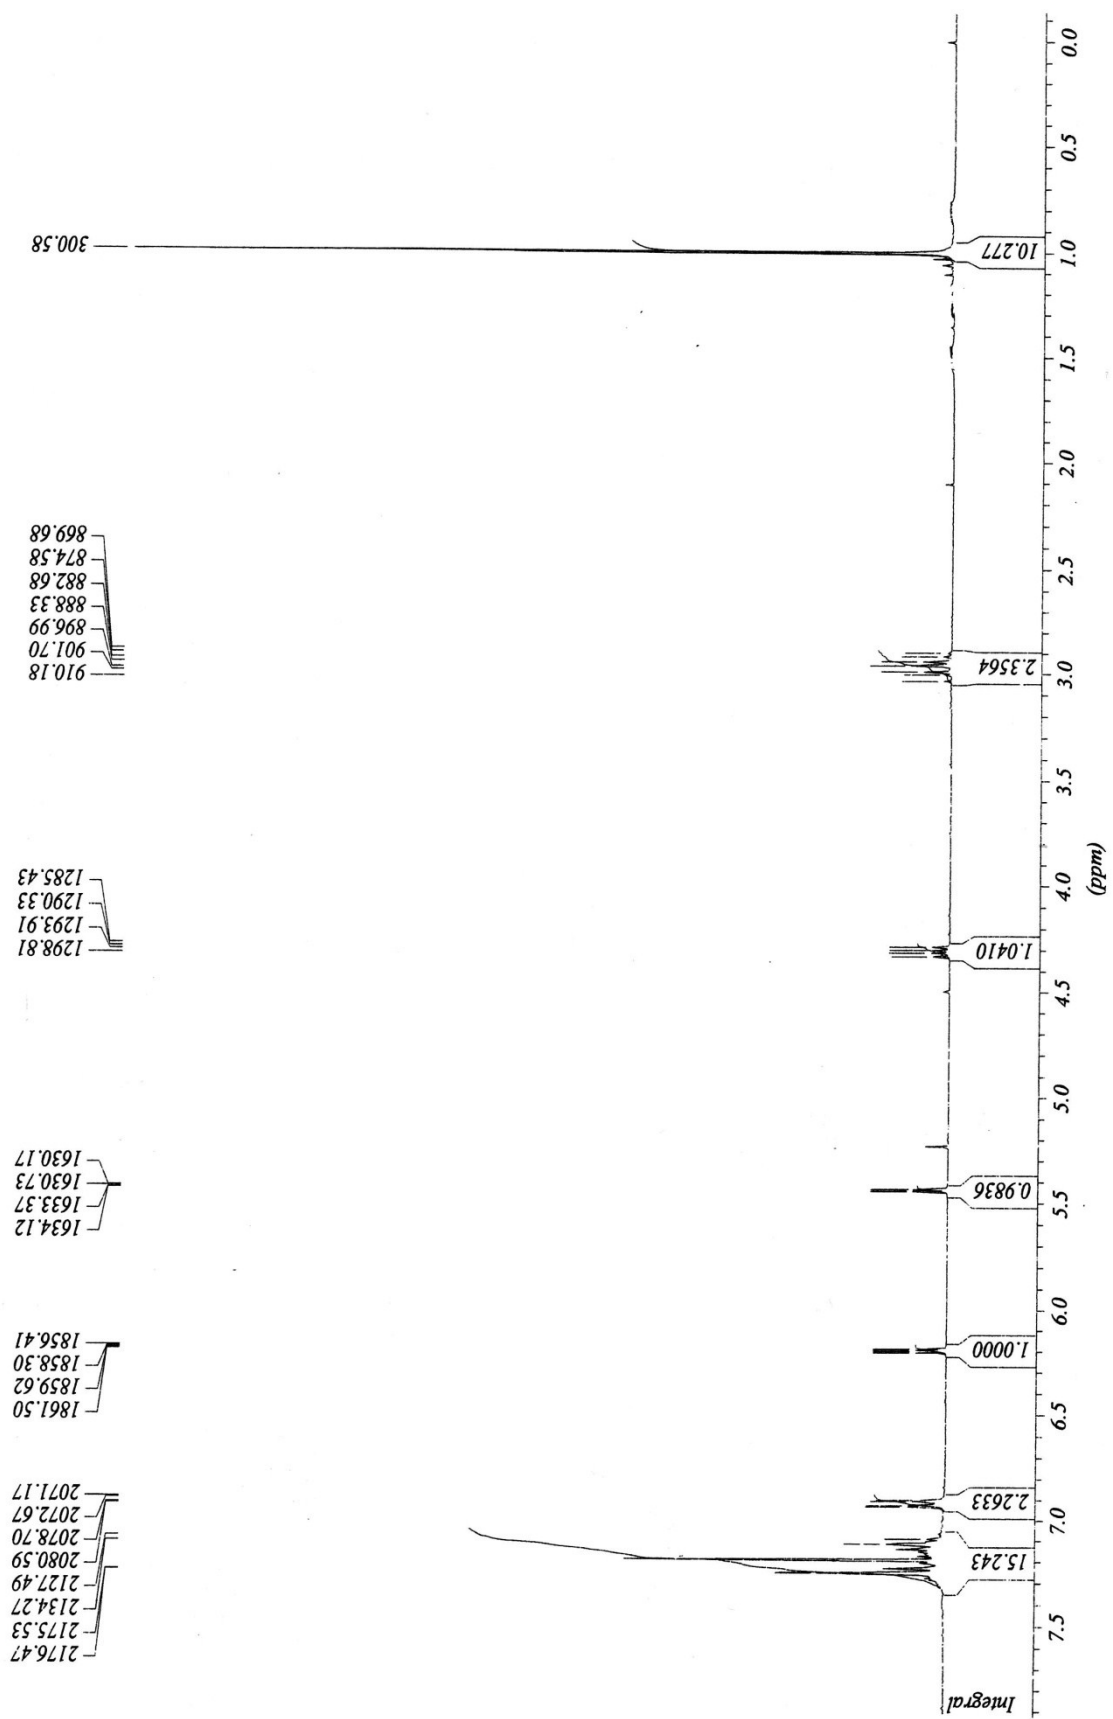

Fig. S-25:  $^1\text{H}$  NMR (300 MHz) of compound 7 in  $\text{CDCl}_3$ .

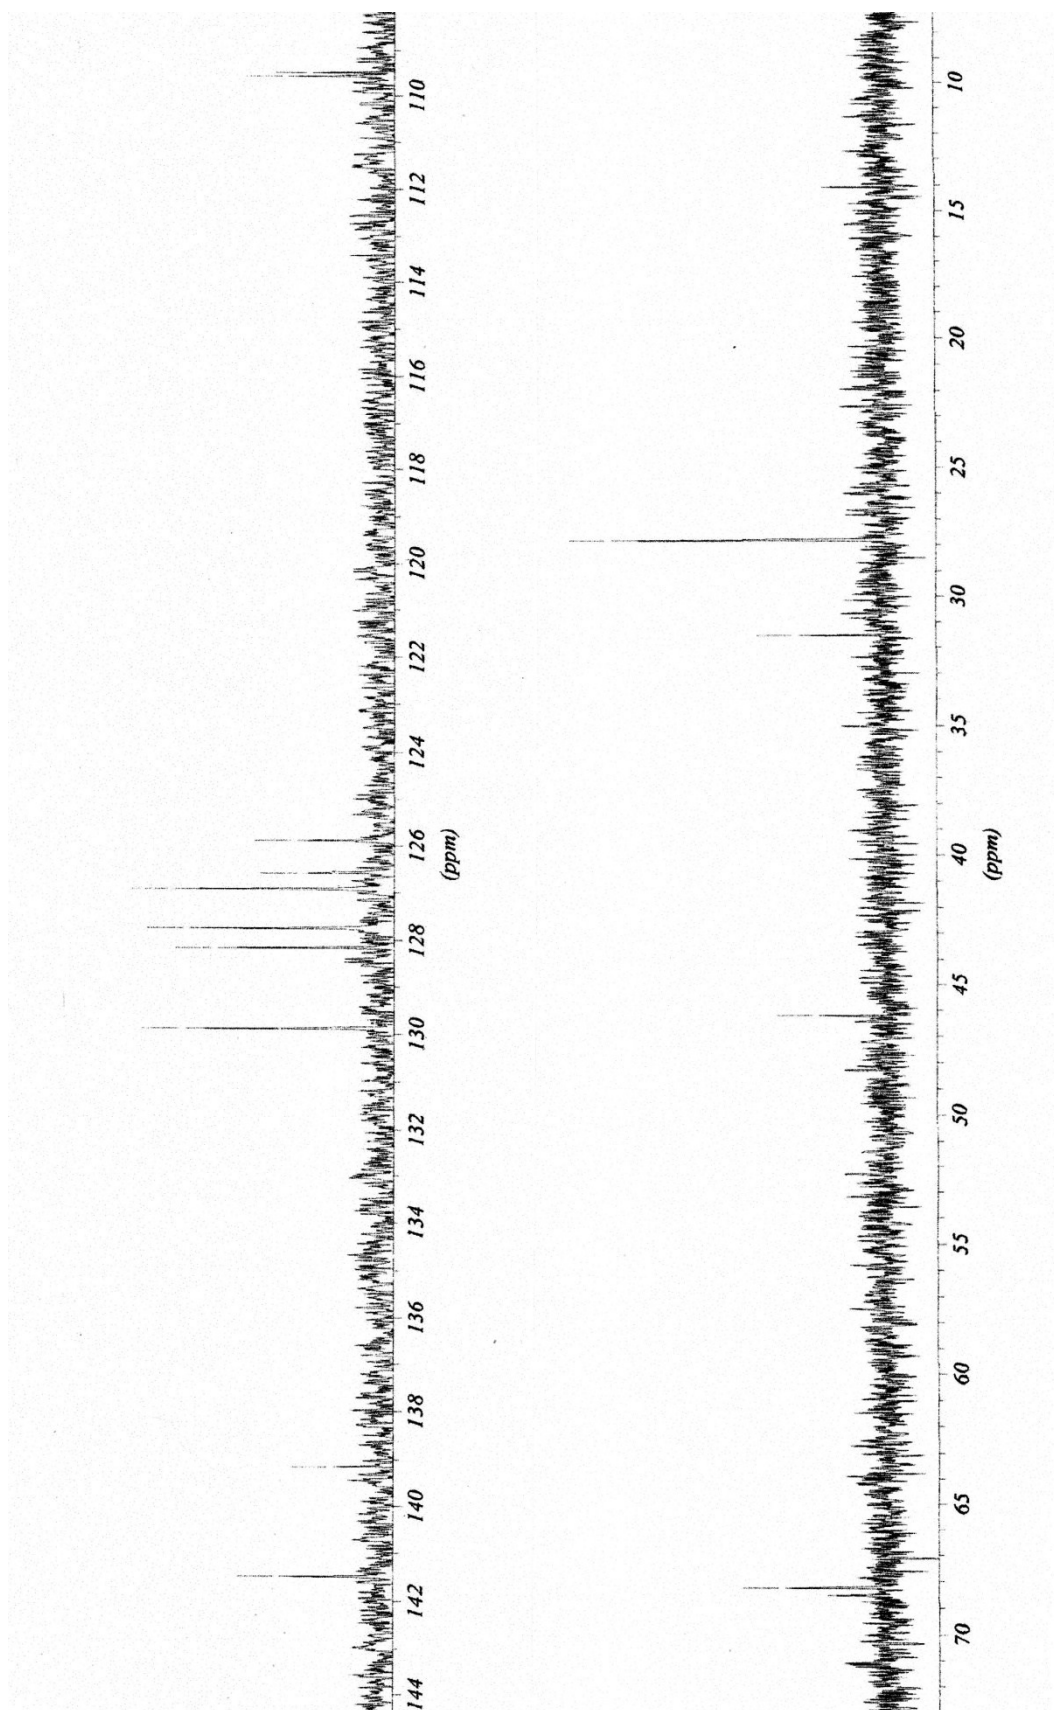

**Fig. S-26:**  $^{13}\text{C}$  NMR (75.4 MHz) of compound 7 in  $\text{CDCl}_3$ .

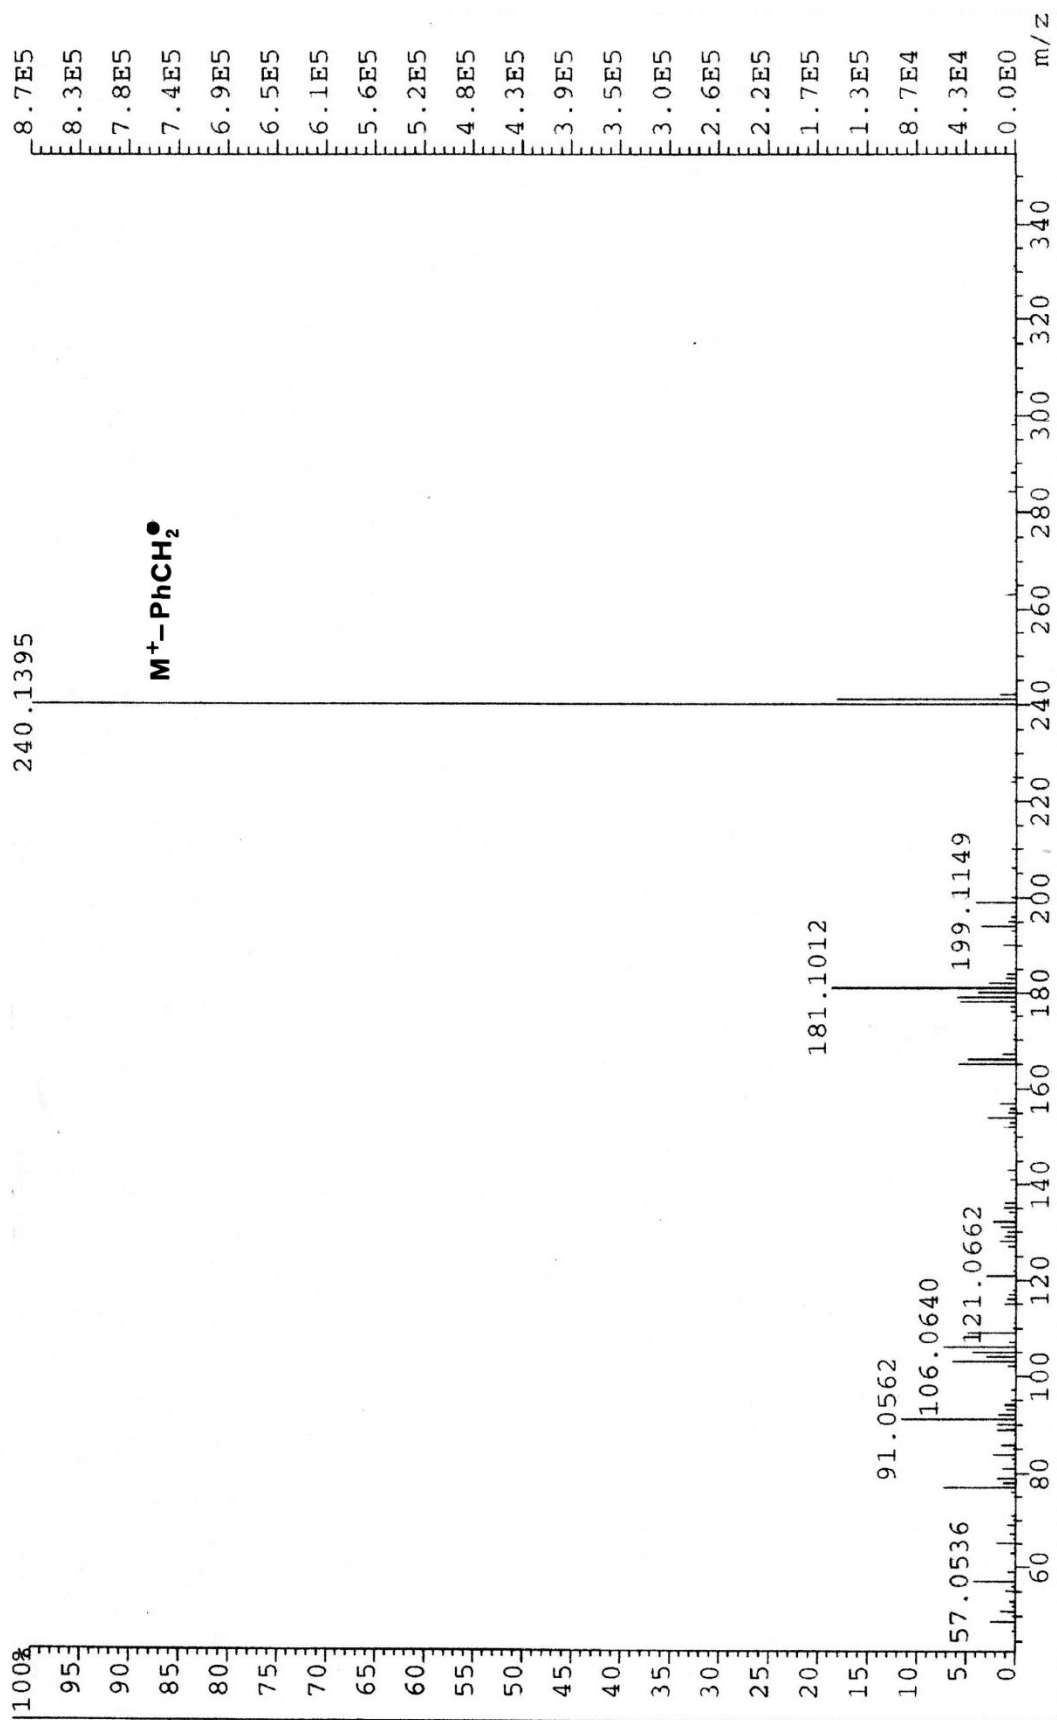

Fig. S-27 Mass Spectrum of compound 7.

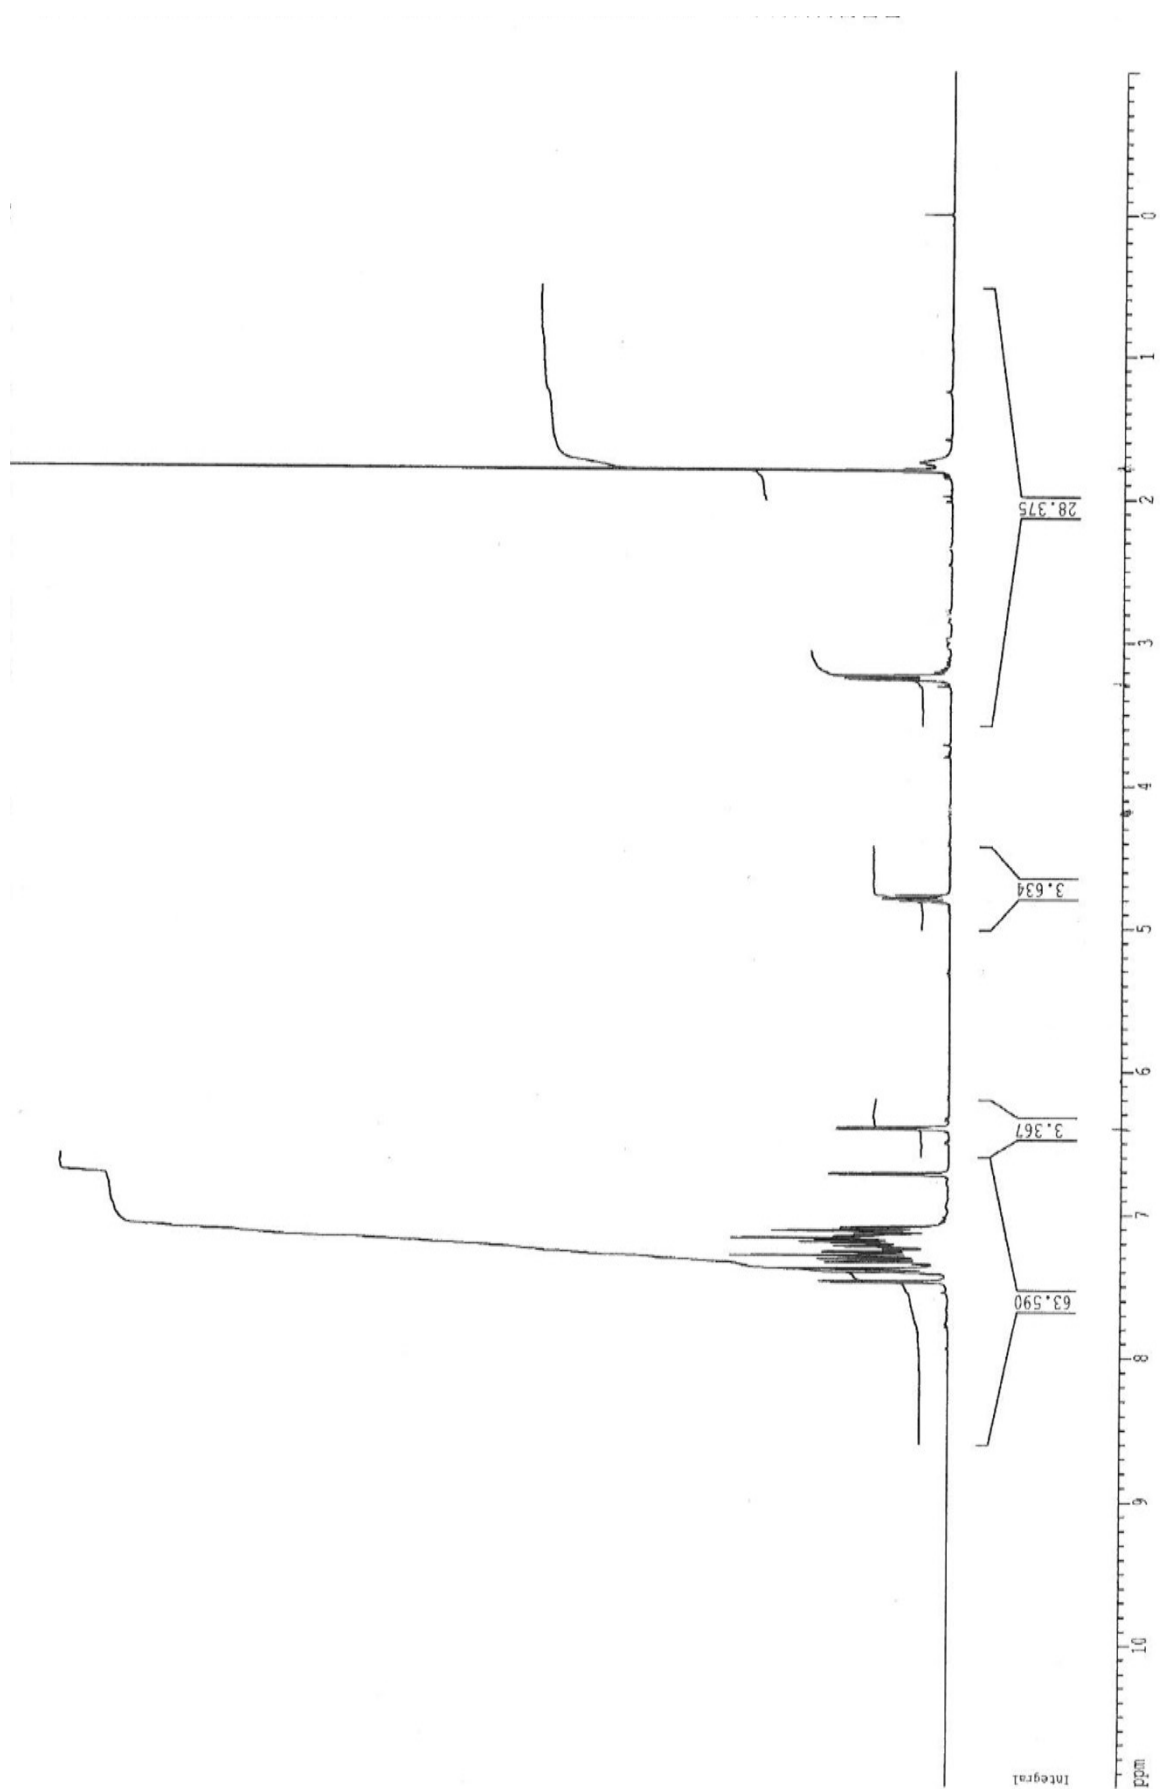

Fig. S-28:  $^1\text{H}$  NMR (300 MHz) of compound **8** in  $\text{CDCl}_3$ .

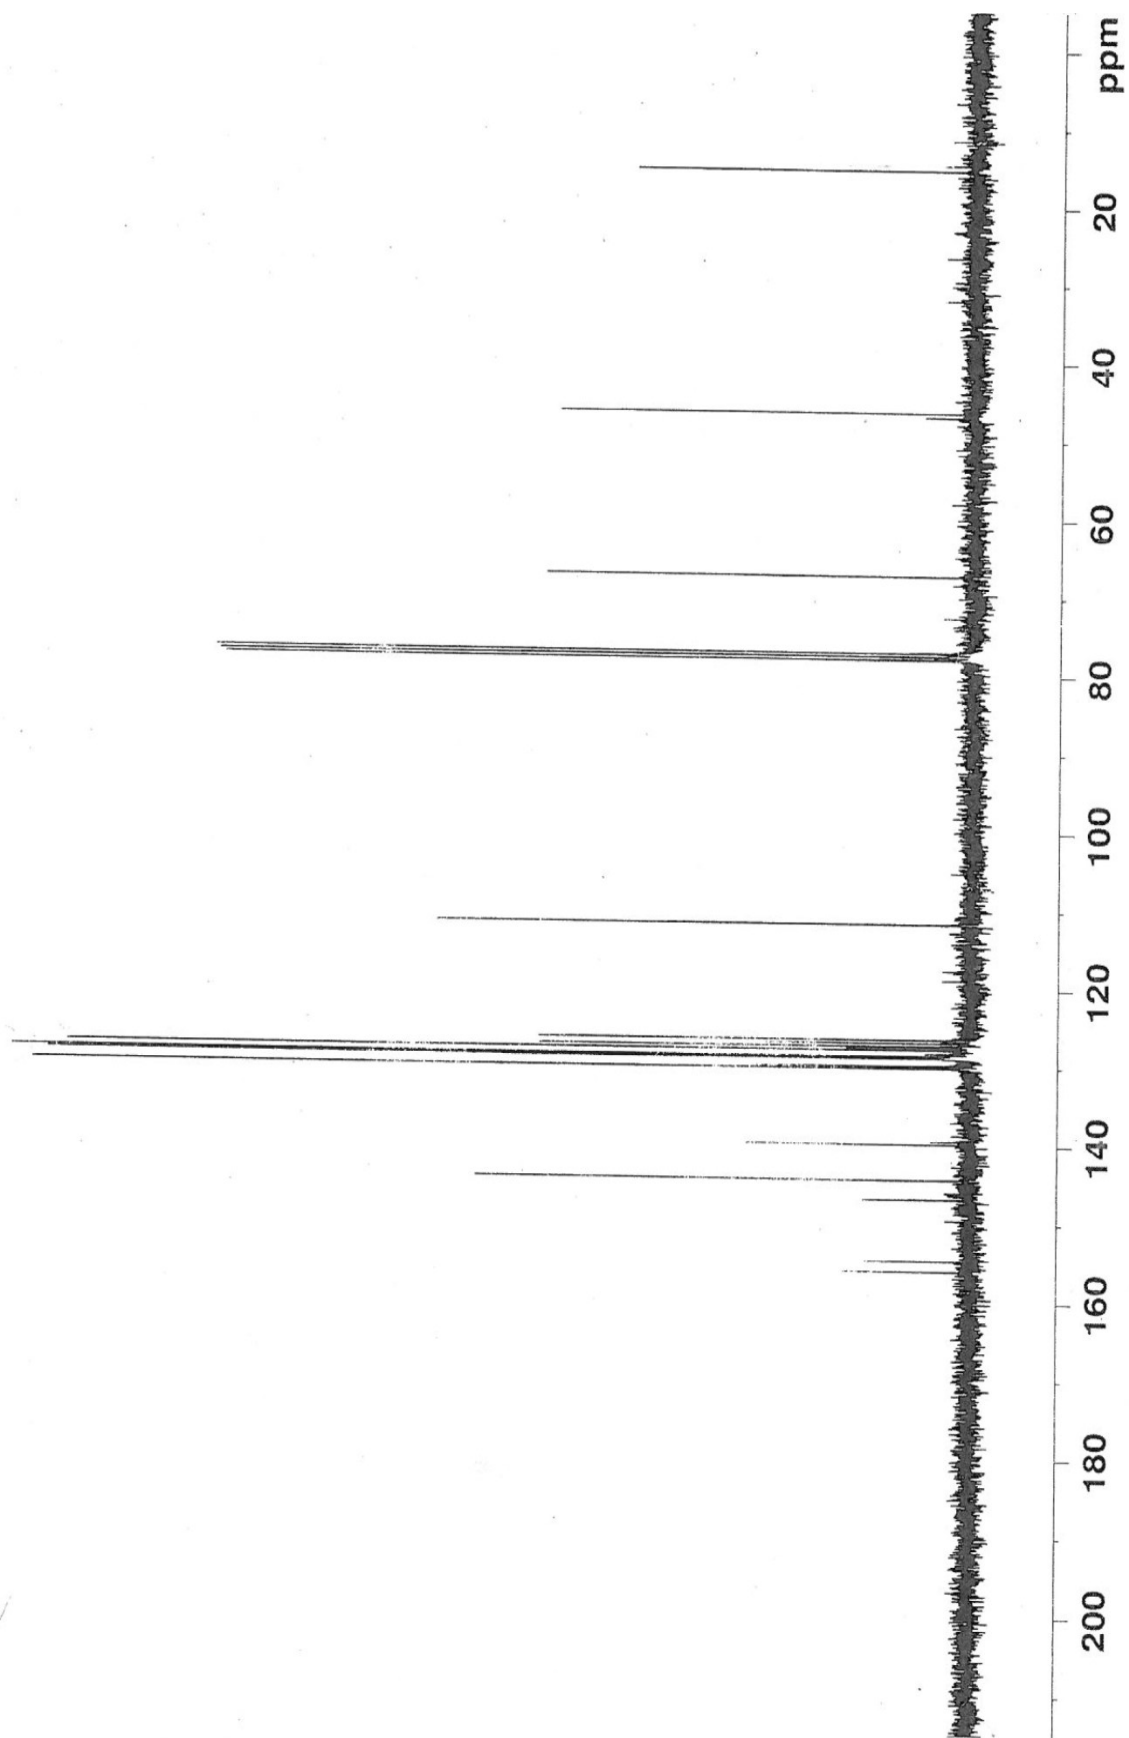

**Fig. S-29:**  $^{13}\text{C}$  NMR (75.4 MHz) of compound **8** in  $\text{CDCl}_3$ .

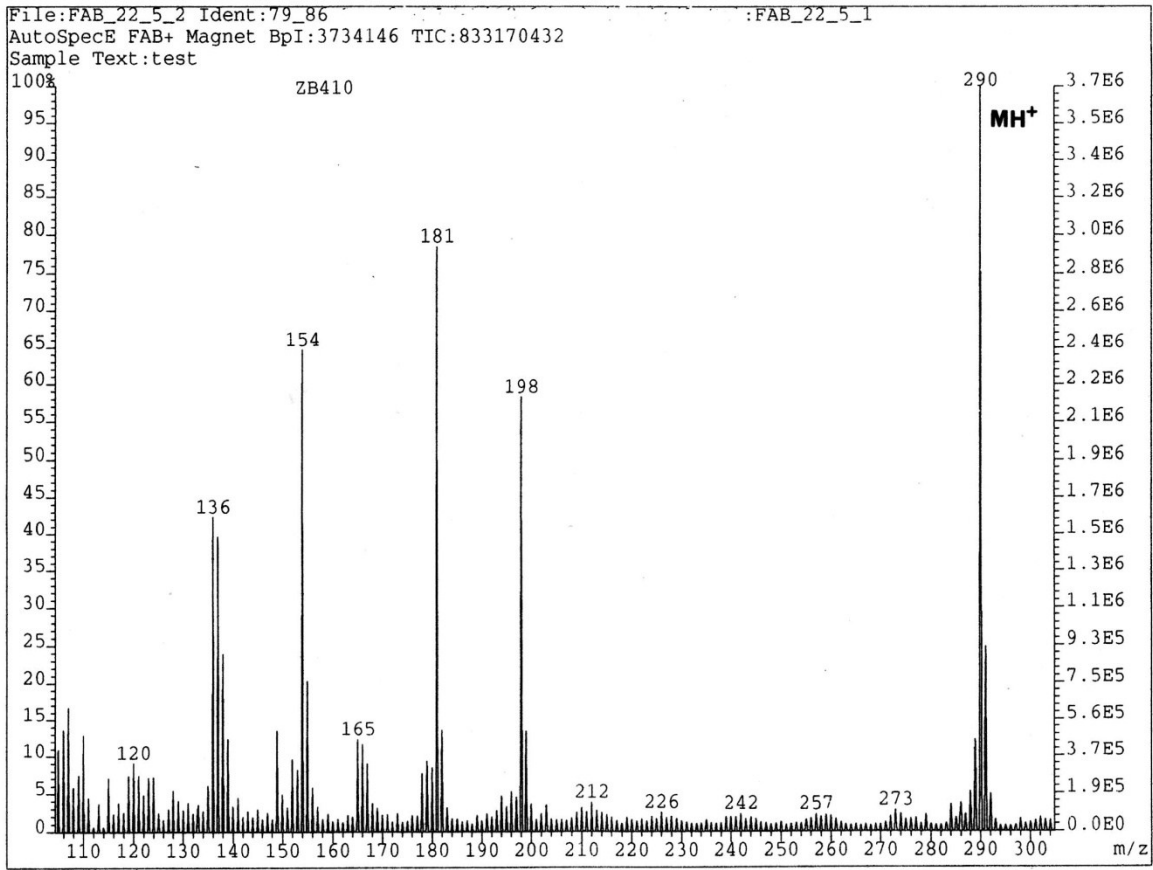

**Elemental Composition**

File:FAB\_23\_5\_1 Ident:10 SMO(1,7) PKD(7,3,7,0.01%,10.0,10.00%,F,F)  
 AutoSpecE FAB+ Voltage BpI:23033 TIC:558570 Flags:NORM  
 Sample Text:test File Text:ZB410  
 Heteroatom Max: 30 Ion: Both Even and Odd  
 Limits:

|         |       |      |  |  |      |    |    |   |   |
|---------|-------|------|--|--|------|----|----|---|---|
| 286.605 | 0.0   |      |  |  | -0.5 | 0  | 0  | 0 | 0 |
| 297.600 | 100.0 | 10.0 |  |  | 20.0 | 20 | 20 | 1 | 1 |

| Mass       | %RA | mDa | PPM | Calc. Mass | DBE  | C  | H  | N | O |
|------------|-----|-----|-----|------------|------|----|----|---|---|
| 290.154145 | 9.7 | 0.3 | 1.2 | 290.154489 | 11.5 | 20 | 20 | 1 | 1 |
| 288.138814 | 0.1 | 0.0 | 0.1 | 288.138839 | 12.5 | 20 | 18 | 1 | 1 |

**Statistic calculations**

|      | mDa  | PPM  |       |
|------|------|------|-------|
| Mean | 0.18 | 0.64 | n = 2 |
| RMS  | 0.24 | 0.84 |       |
| SD   | 0.23 | 0.78 |       |

**Fig. S-30: Mass spectrum of compound 8.**
